# Supplementary material for: Ultrastretchable, fatigue-resistant eutectogel with hierarchical bonding for advanced wearable monitoring
Source: Research Square preprint supplement (doi:10.21203/rs.3.rs-5740232/v1), 2025-04-22
Supplement: Supplementary file 1 [file b49f8cc31e30c0c4f6859cbf.pdf]

# **Ultrastretchable, fatigue-resistant eutectogel with hierarchical bonding for advanced wearable monitoring**

Min Jeong Kim<sup>1,2</sup> · Sung Ho Cho<sup>1,2</sup> · Soong Ju Oh<sup>2</sup> · Sang Woo Kim<sup>1</sup>

<sup>1</sup> Clean Energy Research Center, Korea Institute of Science and Technology (KIST),  
Seoul 02792, Republic of Korea

<sup>2</sup> Department of Materials Science and Engineering, Korea University, Seoul, 02841,  
Republic of Korea

## **AUTHOR INFORMATION**

### **Corresponding Author**

\*E-mail: [swkim@kist.re.kr](mailto:swkim@kist.re.kr). Phone: +82-2-958-5526. Fax: +82-2-958-5219

## List of Supplementary Tables, Figures, and Movies

Supplementary **Table S1**. Component details of ionic eutectogels and organic mixed ionic–electronic conductor (OMIEC) eutectogels

Supplementary **Table S2**. FT-IR peak assignments of PEDOT:PSS film, IC, MC 3, and DMC 3 eutectogels

Supplementary **Table S3**. FT-IR data for the OH stretching region (3,000–3,700  $\text{cm}^{-1}$ ), including (a) peak position ( $\text{cm}^{-1}$ ) and (b) area ratio (%)

Supplementary **Table S4**. XPS peak assignments of the IC, DIC, MC 3, and DMC 3 eutectogels

Supplementary **Table S5**. Raman peak positions and assignments of MC 3 and DMC 3 eutectogels

Supplementary **Table S6**. Quantitative Raman spectroscopy analysis of MC 3 and DMC 3 eutectogels

Supplementary **Table S7**. Electrical and mechanical properties of ionic eutectogels and OMIEC eutectogels

Supplementary **Table S8**. Degree of electromechanical hysteresis (EMH) for eutectogel sensors under various strains at 1 Hz

Supplementary **Table S9**. EMH across various stretch–release cycles for IC, MC 3, and DMC 3 sensors under different strains at 1 Hz

Supplementary **Table S10**. Comparison of EMH between the present study and previously reported strain sensors

Supplementary **Table S11**. Gauge factor (GF) of eutectogel sensors

Supplementary **Table S12**. Response time of the IC sensor at various strain rates under 150% strain

Supplementary **Table S13**. Response time of the MC 3 sensor at various strain rates under 150% strain

Supplementary **Table S14**. Response time of the DMC 3 sensor at various strain rates under 150% strain

Supplementary **Table S15**. Relative resistance change, response time, and mechanical properties of the uncut IC sensor during self-healing following 100,000 fatigue cycles under 50% strain at 1 Hz

Supplementary **Table S16**. Relative resistance change, response time, and mechanical properties of the uncut MC 3 sensor during self-healing following 100,000 fatigue cycles under various strains at 1 Hz

Supplementary **Table S17**. Relative resistance change, response time, and mechanical properties of the uncut DMC 3 sensor during self-healing following 100,000 fatigue cycles under various strains at 1 Hz

Supplementary **Table S18**. Crack length (mm) of precut sensors during cyclic stretching

Supplementary **Table S19**. Crack extension rate ( $\Delta c/\Delta N$ ) for uncut and precut sensors under cyclic stretching

Supplementary **Table S20**. Energy release rate (G) for uncut and precut sensors under cyclic stretching

Supplementary **Table S21**. Summary of electrical and mechanical properties of eutectogel sensors

Supplementary **Table S22**. Comparison of fatigue life cycles between the present study and previously reported stretchable sensors under cyclic stretching in the uncut condition

Supplementary **Figure S1**. Photographs of fabricated eutectogels (DMC 3) in various shapes and sizes: (a) square (125 × 125 mm) and (b) circular (φ58 mm). Optical microscope images of MC-type conductors (MC 1–4) with varying PEDOT:PSS contents: (c) 4.1 wt%, (d) 5.2 wt%, (e) 7.0 wt%, and (f) 8.0 wt%.

Supplementary **Figure S2**. Particle size distribution of DMC conductors (DMC 1–4) with increasing PEDOT:PSS contents: (a) 4.1 wt%, (b) 5.2 wt%, (c) 7.0 wt%, and (d) 8.0 wt%.

Supplementary **Figure S3**. (a) Optical transmittance of eutectogel conductors; (b) Swelling ratio of eutectogel conductors as a function of time (c) Electrical conductivity of DMC 3 as a function of swelling ratio measured by the four-point probe method; (d) Stress-strain curves of DMC 3 at various swelling ratios.

Supplementary **Figure S4**. XPS spectra of (a) IC, (b) MC 3, (c) DIC, and (d) DMC 3 sensors.

Supplementary **Figure S5**. XPS O 1s spectra of (a) MC 1, (b) MC 2, (c) MC 3, and (d) MC 4 sensors.

Supplementary **Figure S6**. XPS O 1s spectra of (a) IC, (b) DIC, (c) MC 3, and (d) DMC 3 sensors.

Supplementary **Figure S7**. Mechanical hysteresis of (a) IC, (b) MC 3, (c) DMC 3 sensors under different strains at 1 Hz. Mechanical hysteresis across various stretch-relaxation cycles for (d) IC, (e) MC 3, and (f) DMC 3 under 600% strain ( $\lambda_{\max}=7$ ). (g) Energy release rate of uncut sensors in the initial and steady state cycles at  $\lambda_{\max}=7$ .

Supplementary **Figure S8**. Enhanced healing efficiency of DMC 3 under both physical compression and thermal annealing conditions.

Supplementary **Figure S9**. Response signals of the sensors during cyclic stretch–release motions at 50% strain under various strain rates: (a, d) IC, (b, e) MC 3, and (c, f) DMC 3 at 4.33Hz; (g) IC, (h) MC 3, and (i) DMC 3 at 1 Hz; (j) IC, (k) MC 3, and (l) DMC 3 at 0.17 Hz.

Supplementary **Figure S10**. Response signals of the sensors during cyclic stretch–release motions at 100% strain under different strain rates: (a, d) IC, (b, e) MC 3, and (c, f) DMC 3 at 4.33Hz; (g) IC, (h) MC 3, and (i) DMC 3 at 1 Hz; (j) IC, (k) MC 3, and (l) DMC 3 at 0.17 Hz.

Supplementary **Figure S11**. Stress–strain curves and response signals of the uncut MC 3 sensor after autonomous recovery following 100,000 cycles at 1 Hz under strains of (a, c) 50% and (b, d) 100% strain.

Supplementary **Figure S12**. Stress–strain curves and response signals of the uncut DMC 3 sensor after autonomous recovery following 100,000 stretch–release cycles at 1 Hz under strains of (a, c) 50%, (b, d) 100%, and (e, f) 150%.

Supplementary **Figure S13**. Relative resistance changes ( $\Delta R/R_0$ ) of DMC 3 sensors measured at room temperature under varying relative humidity conditions: (a) 30% RH, (b) 50% RH, (c) 70% RH, and (d) 90% RH. The sensors were placed in a temperature-controlled chamber and stabilized at each humidity level for 5 minutes before applying repeated on-off cycles to obtain  $\Delta R/R_0$  from the I-V curve. The measurements indicate minimal resistance variation across the tested humidity range, highlighting the humidity-resistant performance of DMC 3 sensors.

Supplementary **Figure S14**. Relative resistance changes ( $\Delta R/R_0$ ) of DMC 3 sensors at room temperature under different swelling ratios: (a) original, (b) 10%, (c) 20%, (d) 30%, (e) 50%, and (f)  $\Delta R/R_0$  versus stretching cycles at different swelling ratios.

Supplementary **Figure S15**. Schematic of fatigue cyclic test conditions for (a) uncut and (b) pre-cut sample with single notch. Rectangular samples (50×30×1.0 mm<sup>3</sup>) were clamped in two rigid grips and mounted in a tensile testing machine with a 100 N load cell. The length (H = 10 mm) and width (W = 30 mm) of samples in the undeformed state were used for cyclic stretch tests. Fatigue-resistance tests were performed using the single-notch method with a 10 mm pre-cut crack length, subjected to cyclic stretching at maximum

stretch ( $\lambda_{\max}$ ) at a crosshead speed of 750 mm/min.

Supplementary **Figure S16**. Crack growth ( $\Delta c$ ) over fatigue cycles (N) at various  $\lambda_{\max}$  levels for single-notch sensors: (a) IC, (b) DIC, (c) MC 3, and (d) DMC 3.

Supplementary **Figure S17**. Variation of crack extension rate ( $\Delta c/\Delta N$ ) with stretch ( $\lambda_{\max}$ ) for single-notch sensors.

Supplementary **Figure S18**. Crack extension rate ( $\Delta c/\Delta N$ ) as a function of energy release rate ( $G$ ) and fatigue threshold ( $G_c$ ) for the single-notch DIC sensor.

Supplementary **Figure S19**. Progression of pre-crack length in single-notch IC sensors during fatigue cycling tests at various  $\lambda_{\max}$  levels.

Supplementary **Figure S20**. Progression of pre-crack length in single-notch DIC sensors during fatigue cycling tests at various  $\lambda_{\max}$  levels.

Supplementary **Figure S21**. Progression of pre-crack length in single-notch MC 3 sensors during fatigue cycling tests at various  $\lambda_{\max}$  levels.

Supplementary **Figure S22**. Progression of pre-crack length in single-notch DMC 3 sensors during fatigue cycling tests at various  $\lambda_{\max}$  levels.

Supplementary **Figure S23**. Photographs showing self-healing of (a) single-notch DIC at  $\lambda_{\max}=1.75$  and (b) single-notch DMC 3 at  $\lambda_{\max}=1.5$  during cyclic stretching from 10 to 8,000 cycles.

Supplementary **Figure S24**. Response signals from the skin-attached DMC 3 sensors with different swelling ratios monitoring various human physiological movements. Ankle movements: (a) 10% and (c) 50%; Wrist movements: (b) 10% and (d) 50%.

Supplementary **Figure S25**. Relative resistance changes of the uncut DMC 3 sensor over 7,000 stretch-release cycles under 300% strain ( $\lambda_{\max} = 4$ ) at 1 Hz (top). The bottom graph shows the stable resistance response of the DMC 3 sensor during cyclic testing.

Supplementary **Movie 1**. Tensile stress–strain test of the DMC 3 sensor (16x speed).

Supplementary **Movie 2**. Skin adhesion test of the DMC 3 sensor.

Supplementary **Movie 3**. Stretching test of the DMC 3 sensor.

Supplementary **Movie 4**. Response signal monitoring by the IC sensor during cyclic fatigue test over 100,000 stretch-release cycles under 50% strain at 1 Hz.

Supplementary **Movie 5**. Response signal monitoring by the MC 3 sensor during cyclic fatigue test over 100,000 stretch-release cycles under 150% strain at 1 Hz.

Supplementary **Movie 6**. Response signal monitoring by the DMC 3 sensor during cyclic fatigue test over 100,000 stretch-release cycles under 200% strain at 1 Hz.

Supplementary **Movie 7**. Monitoring of current signals from the DMC 3 sensor attached to the wrist during repetitive bending and extension movements.

Supplementary **Movie 8**. Monitoring of current signals from the DMC 3 sensor during repetitive handwriting movements.

**Table S1.** The component details of ionic eutectogels and organic mixed ionic–electronic conductor (OMIEC) eutectogels

| <b>Sample</b>     | <b>ChCl<br/>(wt%)</b> | <b>Gly<br/>(wt%)</b> | <b>AA<br/>(wt%)</b> | <b>Initiator<br/>(wt%)</b> | <b>PEG(575)DA<br/>(wt%)</b> | <b>PEDOT:PSS<br/>(wt%)</b> |
|-------------------|-----------------------|----------------------|---------------------|----------------------------|-----------------------------|----------------------------|
| PEDOT:PSS<br>film | 0                     | 0                    | 0                   | 0                          | 0                           | 100                        |
| IC                | 30.2                  | 39.8                 | 28.9                | 1.0                        | 0.1                         | 0                          |
| MC 1              | 28.4                  | 37.5                 | 28.9                | 1.0                        | 0.1                         | 4.1                        |
| MC 2              | 27.9                  | 36.9                 | 28.9                | 1.0                        | 0.1                         | 5.2                        |
| MC 3              | 27.2                  | 35.8                 | 28.9                | 1.0                        | 0.1                         | 7.0                        |
| MC 4              | 26.7                  | 35.3                 | 28.9                | 1.0                        | 0.1                         | 8.0                        |
| DIC               | 30.2                  | 39.8                 | 28.9                | 1.0                        | 0.1                         | 0                          |
| DMC 1             | 28.4                  | 37.5                 | 28.9                | 1.0                        | 0.1                         | 4.1                        |
| DMC 2             | 27.9                  | 36.9                 | 28.9                | 1.0                        | 0.1                         | 5.2                        |
| DMC 3             | 27.2                  | 35.8                 | 28.9                | 1.0                        | 0.1                         | 7.0                        |
| DMC 4             | 26.7                  | 35.3                 | 28.9                | 1.0                        | 0.1                         | 8.0                        |

Abbreviations: ChCl: Choline chloride, Gly: Glycerol, AA: Acrylic acid, PEDOT:PSS: Poly(3,4-ethylenedioxythiophene):poly(styrene sulfonate), Photoinitiator: 2-oxoglutaric acid, Cross-linker: Poly(ethylene glycol) diacrylate (PEG(575)DA).

**Table S2.** FT-IR peak assignments of PEDOT:PSS film, IC, MC 3, and DMC 3 eutectogels

| Functional groups                                                | PEDOT:PSS<br>( $\text{cm}^{-1}$ ) | IC<br>( $\text{cm}^{-1}$ ) | DIC<br>( $\text{cm}^{-1}$ ) | MC 3<br>( $\text{cm}^{-1}$ ) | DMC 3<br>( $\text{cm}^{-1}$ ) |
|------------------------------------------------------------------|-----------------------------------|----------------------------|-----------------------------|------------------------------|-------------------------------|
| O—H stretching                                                   | 3,408, 3,206                      | 3,332, 3,339               | 3,331, 3,345<br>3,353       | 3,331, 3,345<br>3,353        | 3,332, 3,345,<br>3,370        |
| CH <sub>2</sub> asymmetric,<br>symmetric stretching<br>(Gly, EG) | —                                 | 2,931<br>2,876             | 2,938<br>2876               | 2,931<br>2,876               | 2,934<br>2,876                |
| C=O stretching (PAA)                                             | —                                 | 1,723                      | 1,719                       | 1,720                        | 1,717                         |
| C=C asymmetric<br>stretching                                     | 1,598 (PSS),<br>1,520 (PEDOT)     | —                          | —                           | —                            | —                             |
| N <sup>+</sup> —(CH <sub>3</sub> ) <sub>3</sub><br>bending(ChCl) | —                                 | 1,477                      | 1,476                       | 1,477                        | 1,473                         |
| CH <sub>2</sub> bending (PAA,<br>Gly, EG)                        | —                                 | 1,453                      | 1,452                       | 1,452                        | 1,455                         |
| C—C inter-ring<br>stretching (PEDOT)                             | 1,270                             | —                          | —                           | —                            | —                             |
| C—O—H bending (EG,<br>Gly, PAA)                                  | —                                 | 1,415                      | 1,412                       | 1,415                        | 1,412                         |
| C—O—H stretching<br>(PAA, ChCl, Gly)                             | —                                 | 1,237                      | 1,247                       | 1,236                        | 1,242                         |
| C—O stretching<br>(ChCl)                                         | —                                 | 1,171                      | 1,176                       | 1,170                        | 1,175                         |
| S—O, S—phenyl (PSS)                                              | 1,162, 1,122                      | —                          | —                           | —                            | —                             |
| C—C—O (EG), C—O<br>stretching (ChCl)                             | —                                 | 1,086                      | 1,083                       | 1,086                        | 1,084                         |
| C—O—C (PEDOT)                                                    | 1,057                             | —                          | —                           | —                            | —                             |
| O—S—O symmetric<br>stretching (PSS)                              | 1,010                             | —                          | —                           | —                            | —                             |
| C—C—O asymmetric<br>stretching (Gly, EG)                         | —                                 | 1,042                      | 1,037                       | 1,042                        | 1,039                         |
| N <sup>+</sup> —C (ChCl)                                         | —                                 | 956                        | 954                         | 956                          | 956                           |
| C—S—C (PEDOT)                                                    | 945, 859, 707                     | —                          | —                           | —                            | —                             |
| C—OH stretching<br>(Gly)                                         | —                                 | 923                        | 922                         | 923                          | 923                           |
| CH <sub>2</sub> rocking vibration<br>(EG)                        | —                                 | —                          | 881                         | —                            | 882                           |
| C—C stretching<br>(Gly/EG)                                       | —                                 | 864                        | 864                         | 864                          | 864                           |

**Table S3.** FT-IR data for the OH stretching region (3,000–3,700  $\text{cm}^{-1}$ ), including (a) peak position ( $\text{cm}^{-1}$ ) and (b) area ratio (%)

(a)

| Functional groups                                         | PEDOT:PSS ( $\text{cm}^{-1}$ ) | IC ( $\text{cm}^{-1}$ ) | DIC ( $\text{cm}^{-1}$ ) | MC 3 ( $\text{cm}^{-1}$ ) | DMC 3 ( $\text{cm}^{-1}$ ) |
|-----------------------------------------------------------|--------------------------------|-------------------------|--------------------------|---------------------------|----------------------------|
| Free OH, Water                                            | —                              | 3,506                   | 3,506                    | 3,512                     | 3,511                      |
| OH—SO <sub>x</sub> <sup>-</sup> (PSS)/ PEDOT <sup>+</sup> | 3,408                          | —                       | —                        | 3,420                     | 3,421                      |
| OH—OH                                                     | —                              | 3,375                   | 3,356                    | 3,358                     | 3,343                      |
| OH—Cl <sup>-</sup>                                        | —                              | 3,250                   | 3,216                    | 3,259                     | 3,260                      |
| OH—SO <sub>x</sub> <sup>-</sup> (PEDOT:PSS)               | 3,206                          | —                       | —                        | 3,209                     | 3,194                      |
| OH—COOH (PAA)                                             | —                              | 3,158                   | 3,100                    | 3,142                     | 3,126                      |
| OH—SO <sub>x</sub> <sup>-</sup> (PEDOT:PSS)               | 3,039                          | —                       | —                        | 3,040                     | 3,044                      |

(b)

| Functional groups                           | PEDOT:PSS (%) | IC (%) | DIC (%) | MC 3 (%) | DMC 3 (%) |
|---------------------------------------------|---------------|--------|---------|----------|-----------|
| Free OH, Water                              | 0             | 8.4    | 9.8     | 7.0      | 7.6       |
| OH—SO <sub>x</sub> <sup>-</sup> (PEDOT:PSS) | 55.4          | 0      | 0       | 13.5     | 16.3      |
| OH—OH                                       | 0             | 60.4   | 62.5    | 48.6     | 51.0      |
| OH—Cl <sup>-</sup>                          | 0             | 27.9   | 25.6    | 19.9     | 14.5      |
| OH—SO <sub>x</sub> <sup>-</sup> (PEDOT:PSS) | 36.5          | 0      | 0       | 6.7      | 6.1       |
| OH—COOH (PAA)                               | 0             | 3.3    | 2.1     | 4.0      | 4.2       |
| OH—SO <sub>x</sub> <sup>-</sup> (PEDOT:PSS) | 8.0           | 0      | 0       | 0.3      | 0.1       |

**Table S4.** XPS peak assignments of the IC, DIC, MC 3, and DMC 3 eutectogels

| Sample | State | Binding energy (eV) | Bonding                | Proportion (%)    |    |
|--------|-------|---------------------|------------------------|-------------------|----|
| IC     | O 1s  | 532.5               | C—O                    | 75.16             |    |
|        |       | 533.1               | C—OH                   | 24.84             |    |
| DIC    | O 1s  | 532.4               | C—O                    | 65.13             |    |
|        |       | 532.7               | C—OH                   | 34.87             |    |
| MC 3   | O 1s  | 531.5               | O=S (PSS)              | 31.5              |    |
|        |       | 532.2               | C—O/C—O—C              | 48.43             |    |
|        |       | 533.6               | C—OH                   | 20.07             |    |
|        | S 2p  | 163.1               | C—S (PEDOT)            | 2p <sub>3/2</sub> | 42 |
|        |       | 165.2               |                        | 2p <sub>1/2</sub> |    |
|        |       | 167.8               | S—O <sub>x</sub> (PSS) | 2p <sub>3/2</sub> | 58 |
|        |       | 168.9               |                        | 2p <sub>1/2</sub> |    |
| DMC 3  | O 1s  | 531.5               | O=S (PSS)              | 18.9              |    |
|        |       | 532.23              | C—O/C—O—C              | 56.26             |    |
|        |       | 533.4               | C—OH                   | 24.84             |    |
|        | S 2p  | 163.2               | C—S (PEDOT)            | 2p <sub>3/2</sub> | 61 |
|        |       | 165.1               |                        | 2p <sub>1/2</sub> |    |
|        |       | 168.1               | S—O <sub>x</sub> (PSS) | 2p <sub>3/2</sub> | 39 |
|        |       | 168.9               |                        | 2p <sub>1/2</sub> |    |



**Table S5.** Raman peak positions and assignments of MC 3 and DMC 3 eutectogels

| Moiety                         | MC 3<br>(cm <sup>-1</sup> ) | DMC 3<br>(cm <sup>-1</sup> ) |
|--------------------------------|-----------------------------|------------------------------|
| C <sub>α</sub> -C <sub>α</sub> | 1,263.1                     | 1,260.8                      |
| C <sub>β</sub> -C <sub>β</sub> | 1,368.8                     | 1,367.7                      |
| C <sub>α</sub> =C <sub>β</sub> | 1,448.4                     | 1,442.8                      |
| C <sub>α</sub> ≡C <sub>β</sub> | 1,501.6                     | 1,503.8                      |

**Table S6.** Quantitative Raman spectroscopy analysis of MC 3 and DMC 3 eutectogels

| Sample | State   | Shift<br>( $\text{cm}^{-1}$ ) | Bonding                                       | Proportion<br>(%) |
|--------|---------|-------------------------------|-----------------------------------------------|-------------------|
| MC 3   | Quinoid | 1,425.2                       | $\text{C}_\alpha\text{-C}_\beta$<br>symmetric | 38.86             |
|        | Benzoid | 1,447.8                       | $\text{C}_\alpha\text{=C}_\beta$<br>symmetric | 61.14             |
| DMC 3  | Quinoid | 1,428.5                       | $\text{C}_\alpha\text{-C}_\beta$<br>symmetric | 51.61             |
|        | Benzoid | 1,445.7                       | $\text{C}_\alpha\text{=C}_\beta$<br>symmetric | 48.39             |

**Table S7.** Electrical and mechanical properties of ionic eutectogels and OMIEC eutectogels

| <b>Sample</b>             | <b>PEDOT:PSS<br/>concentration<br/>(wt.%)</b> | <b>Conductivity<br/>(S/m)</b> | <b>Tensile<br/>strength<br/>(kPa)</b> | <b>Elongation<br/>at break<br/>(%)</b> | <b>Elastic<br/>modulus<br/>(kPa)</b> |
|---------------------------|-----------------------------------------------|-------------------------------|---------------------------------------|----------------------------------------|--------------------------------------|
| <b>PEDOT:PSS<br/>film</b> | 100                                           | 13.1                          | –                                     | –                                      | –                                    |
| <b>IC</b>                 | 0                                             | 0.017                         | 90±2.9                                | 1,038±15.3                             | 11±1.3                               |
| <b>MC 1</b>               | 4.1                                           | 0.032                         | 90±4.4                                | 1,134±14.8                             | 14±0.8                               |
| <b>MC 2</b>               | 5.2                                           | 0.061                         | 93±3.6                                | 1,134±17.5                             | 15 ±0.5                              |
| <b>MC 3</b>               | 7.0                                           | 0.19                          | 95±4.3                                | 1,600±21.3                             | 17±1.1                               |
| <b>MC 4</b>               | 8.0                                           | 0.026                         | 43±2.2                                | 1,235±20.6                             | 12±0.8                               |
| <b>DIC</b>                | 0                                             | 0.11                          | 95±3.1                                | 1,217±21.3                             | 19±0.6                               |
| <b>DMC 1</b>              | 4.1                                           | 0.17                          | 93±3.3                                | 1,783±19.1                             | 20±0.9                               |
| <b>DMC 2</b>              | 5.2                                           | 0.21                          | 102±2.8                               | 1,786±22.3                             | 21±1.4                               |
| <b>DMC 3</b>              | 7.0                                           | 1.12                          | 142±3.1                               | 3,065±53.0                             | 26±0.7                               |
| <b>DMC 4</b>              | 8.0                                           | 0.21                          | 59±2.6                                | 2,145±28.5                             | 14±1.2                               |

**Table S8.** Degree of electromechanical hysteresis (EMH) for eutectogel sensors under various strains at 1 Hz

| Strain (%) | IC         | MC 3       | DMC 3      |
|------------|------------|------------|------------|
| 100        | 7.46±0.92  | 1.48±0.23  | 0.28 ±0.13 |
| 400        | 15.74±1.82 | 1.56±0.31  | 0.45 ±0.12 |
| 600        | 17.03±3.24 | 1.65 ±0.06 | 0.57±0.04  |
| 700        | 17.37±1.87 | 1.91±0.6   | 0.9 ±0.27  |
| 1000       | –          | 2.08±0.63  | 0.99 ±0.29 |
| 1300       |            | 2.11±0.89  | 1.01 ±0.52 |
| 1500       |            | 5.55±0.91  | 1.02±0.47  |
| 1600       |            | –          | 3.8 ±0.34  |
| 2000       |            | –          | 7.97±0.56  |

**Table S9.** EMH across various stretch–release cycles for IC, MC 3, and DMC 3 sensors under various strains at 1 Hz

| <b>Strain (%)</b> | <b>Cycle</b> | <b>IC</b>  | <b>MC 3</b> | <b>DMC 3</b> |
|-------------------|--------------|------------|-------------|--------------|
| <b>400</b>        | 1            | 15.74±1.82 |             |              |
|                   | 5            | 21.14±1.93 |             |              |
|                   | 10           | 20.92±1.36 |             |              |
|                   | 50           | 19.69±1.58 |             |              |
|                   | 100          | 28.16±2.78 |             |              |
| <b>600</b>        | 1            | 17.03±3.24 | 1.65 ±0.06  | 0.57±0.04    |
|                   | 5            | 30±4.71    | 2.37 ±0.11  | 0.66±0.06    |
|                   | 10           | –          | 2.42±0.17   | 0.77±0.05    |
|                   | 50           |            | 2.47±0.21   | 0.88±0.08    |
|                   | 100          |            | 2.77±0.28   | 1.75±0.10    |
| <b>1,000</b>      | 1            |            | 1.56±0.31   | 0.8±0.33     |
|                   | 5            |            | 2.6±0.76    | 1.99±0.45    |
|                   | 10           |            | 3.35±0.83   | 3.13±0.57    |
|                   | 50           |            | 5.36±1.07   | 3.84±0.55    |
|                   | 100          |            | 5.64±1.02   | 4.37±0.81    |
| <b>1,500</b>      | 1            |            | 5.55±0.91   | 1.02±0.47    |
|                   | 5            |            | 7.38±0.83   | 1.04±0.53    |
|                   | 10           |            | 11.51±1.02  | 3.35±0.58    |
|                   | 50           |            | 11.61±1.38  | 3.44±0.62    |
|                   | 100          |            | 12.09±1.11  | 3.47±0.84    |
| <b>2,000</b>      | 1            |            |             | 7.97±1.31    |
|                   | 5            |            |             | 10.51±1.85   |
|                   | 10           |            |             | 14.94±1.94   |
|                   | 50           |            |             | 17.61±2.13   |
|                   | 100          |            |             | –            |

**Table S10.** Comparison of EMH between the present study and previously reported strain sensors

| <b>Material</b>                 | <b>Strain (%)</b> | <b>Resistance hysteresis (%)</b> | <b>Supplementary reference</b> |
|---------------------------------|-------------------|----------------------------------|--------------------------------|
| <b>IC</b>                       | 100               | 7.5                              | This work                      |
|                                 | 400               | 7.9                              |                                |
|                                 | 700               | 17.4                             |                                |
| <b>MC 3</b>                     | 100               | 1.5                              | This work                      |
|                                 | 400               | 1.6                              |                                |
|                                 | 700               | 1.9                              |                                |
|                                 | 1,000             | 2.1                              |                                |
|                                 | 1,300             | 2.1                              |                                |
| <b>DMC 3</b>                    | 100               | 0.3                              | This work                      |
|                                 | 400               | 0.5                              |                                |
|                                 | 700               | 0.9                              |                                |
|                                 | 1,000             | 1.0                              |                                |
|                                 | 1,300             | 1.0                              |                                |
|                                 | 1,500             | 1.0                              |                                |
|                                 | 1,600             | 3.8                              |                                |
|                                 | 2,000             | 8.0                              |                                |
| ChCl/AA/PEDOT:PSS eutectogel    | 100               | 23.1                             | [1]                            |
|                                 | 300               | 19.1                             |                                |
|                                 | 500               | 42.6                             |                                |
|                                 | 800               | 55.9                             |                                |
| H- ChCl/AA/PEDOT:PSS eutectogel | 100               | 12.5                             | [1]                            |
|                                 | 300               | 11.6                             |                                |
|                                 | 500               | 30.3                             |                                |
|                                 | 800               | 45.9                             |                                |
| PEDOT:PSS/PVA hydrogel          | 300               | 1.5                              | [2]                            |
| CNT/PEDOT:PSS@NR microfiber     | 100               | 10.8                             | [3]                            |
| PEDOT:PSS–PAAm organogel        | 50                | 10.0                             | [4]                            |

|                                                 |       |      |      |
|-------------------------------------------------|-------|------|------|
| MWCNT/PEDOT:PSS based fiber                     | 50    | 15.2 | [5]  |
| PEDOT:PSS on PDMS microchannel                  | 30    | 9.2  | [6]  |
| VSNPs/PAAm/alginate hydrogel nanocomposites     | 100   | 2.4  | [7]  |
| K-carrageenan/PAAm hydrogel                     | 1,000 | 9.6  | [8]  |
| PVA/AgNWs Bilayer hydrogel nanocomposites       | 250   | 7.0  | [9]  |
|                                                 | 50    | 3.0  |      |
| MWCNT/silicone rubber conducting nanocomposites | 100   | 5.0  | [10] |
|                                                 | 200   | 8.0  |      |
|                                                 | 300   | 11   |      |
| POCL elastomer                                  | 300   | 1.0  | [11] |
| EG-NaCl-Ecoflex ionogel                         | 250   | 0.2  | [12] |

**Table S11.** Gauge factor (GF) of eutectogel sensors

| <b>Strain interval (%)</b> | <b>IC</b> | <b>MC 3</b> | <b>DMC 3</b> |
|----------------------------|-----------|-------------|--------------|
| 0–600                      | 0.71      | 1.17        | 1.66         |
| 600–1000                   | 1.47      | 1.97        | 2.45         |
| 1000–1400                  | –         | 2.67        | –            |
| 1000–1600                  | –         | –           | 3.91         |
| 1600–2000                  | –         | –           | 1.8          |



**Table S12.** Response time of the IC sensor at various strain rates under 150% strain

| <b>Strain rate<br/>(Hz)</b> | <b>Response<br/>time<br/>(ms)</b> | <b>Strain rate<br/>(Hz)</b> | <b>Response<br/>time<br/>(ms)</b> | <b>Strain rate<br/>(Hz)</b> | <b>Response<br/>time<br/>(ms)</b> |
|-----------------------------|-----------------------------------|-----------------------------|-----------------------------------|-----------------------------|-----------------------------------|
| <b>0.17</b>                 | 2,360                             | <b>1.83</b>                 | 278                               | <b>3.5</b>                  | 122                               |
| <b>0.33</b>                 | 1,300                             | <b>2</b>                    | 216                               | <b>3.67</b>                 | 122                               |
| <b>0.5</b>                  | 895                               | <b>2.17</b>                 | 216                               | <b>3.83</b>                 | 113                               |
| <b>0.67</b>                 | 625                               | <b>2.33</b>                 | 216                               | <b>4</b>                    | 113                               |
| <b>0.83</b>                 | 486                               | <b>2.5</b>                  | 216                               | <b>4.17</b>                 | 103                               |
| <b>1</b>                    | 486                               | <b>2.67</b>                 | 180                               | <b>4.33</b>                 | 94                                |
| <b>1.17</b>                 | 416                               | <b>2.83</b>                 | 180                               |                             |                                   |
| <b>1.33</b>                 | 347                               | <b>3</b>                    | 150                               |                             |                                   |
| <b>1.5</b>                  | 278                               | <b>3.17</b>                 | 141                               |                             |                                   |
| <b>1.67</b>                 | 278                               | <b>3.33</b>                 | 132                               |                             |                                   |

**Table S13.** Response time of the MC 3 sensor at various strain rates under 150% strain

| <b>Strain rate<br/>(Hz)</b> | <b>Response<br/>time<br/>(ms)</b> | <b>Strain rate<br/>(Hz)</b> | <b>Response<br/>time<br/>(ms)</b> | <b>Strain rate<br/>(Hz)</b> | <b>Response<br/>time<br/>(ms)</b> |
|-----------------------------|-----------------------------------|-----------------------------|-----------------------------------|-----------------------------|-----------------------------------|
| <b>0.17</b>                 | 1,805                             | <b>1.83</b>                 | 216                               | <b>3.5</b>                  | 113                               |
| <b>0.33</b>                 | 1,180                             | <b>2</b>                    | 216                               | <b>3.67</b>                 | 103                               |
| <b>0.5</b>                  | 833                               | <b>2.17</b>                 | 180                               | <b>3.83</b>                 | 103                               |
| <b>0.67</b>                 | 625                               | <b>2.33</b>                 | 180                               | <b>4</b>                    | 95                                |
| <b>0.83</b>                 | 486                               | <b>2.5</b>                  | 180                               | <b>4.17</b>                 | 95                                |
| <b>1</b>                    | 416                               | <b>2.67</b>                 | 144                               | <b>4.33</b>                 | 94                                |
| <b>1.17</b>                 | 347                               | <b>2.83</b>                 | 144                               |                             |                                   |
| <b>1.33</b>                 | 347                               | <b>3</b>                    | 144                               |                             |                                   |
| <b>1.5</b>                  | 278                               | <b>3.17</b>                 | 144                               |                             |                                   |
| <b>1.67</b>                 | 278                               | <b>3.33</b>                 | 113                               |                             |                                   |

**Table S14.** Response time of the DMC 3 sensor at various strain rates under 150% strain

| <b>Strain rate<br/>(Hz)</b> | <b>Response<br/>time<br/>(ms)</b> | <b>Strain rate<br/>(Hz)</b> | <b>Response<br/>time<br/>(ms)</b> | <b>Strain rate<br/>(Hz)</b> | <b>Response<br/>time<br/>(ms)</b> |
|-----------------------------|-----------------------------------|-----------------------------|-----------------------------------|-----------------------------|-----------------------------------|
| <b>0.17</b>                 | 1,805                             | <b>1.83</b>                 | 208                               | <b>3.5</b>                  | 103                               |
| <b>0.33</b>                 | 1,110                             | <b>2</b>                    | 180                               | <b>3.67</b>                 | 103                               |
| <b>0.5</b>                  | 763                               | <b>2.17</b>                 | 180                               | <b>3.83</b>                 | 94                                |
| <b>0.67</b>                 | 555                               | <b>2.33</b>                 | 180                               | <b>4</b>                    | 94                                |
| <b>0.83</b>                 | 486                               | <b>2.5</b>                  | 144                               | <b>4.17</b>                 | 84                                |
| <b>1</b>                    | 416                               | <b>2.67</b>                 | 144                               | <b>4.33</b>                 | 84                                |
| <b>1.17</b>                 | 347                               | <b>2.83</b>                 | 144                               |                             |                                   |
| <b>1.33</b>                 | 277                               | <b>3</b>                    | 144                               |                             |                                   |
| <b>1.5</b>                  | 277                               | <b>3.17</b>                 | 131                               |                             |                                   |
| <b>1.67</b>                 | 208                               | <b>3.33</b>                 | 113                               |                             |                                   |

**Table S15.** Relative resistance change, response time, and mechanical properties of the uncut IC sensor during self-healing following 100,000 fatigue cycles under 50% strain at 1 Hz

| Self-healing time<br>(h) | Stretch—release cycle  | 0                    | 100,000 |
|--------------------------|------------------------|----------------------|---------|
|                          |                        | (pristine)           |         |
| 0                        | Applied strain         | 0%                   | 50%     |
|                          | $\Delta R/R_0$         | 0                    | 0.337   |
|                          | Response time (ms)     | 486                  | 486     |
|                          | Elongation (%)         | 1,038 ( $\pm 15.3$ ) | 612     |
|                          | Tensile strength (kPa) | 90 ( $\pm 2.9$ )     | 36      |
| 12                       | $\Delta R/R_0$         | —                    | 0.18    |
|                          | Response time (ms)     | —                    | 486     |
|                          | Elongation (%)         | —                    | 1,017   |
|                          | Tensile strength (kPa) | —                    | 44      |

**Table S16.** Relative resistance change, response time, and mechanical properties of the uncut MC 3 sensor during self-healing following 100,000 fatigue cycles under various strains at 1 Hz

| Self-healing time<br>(h) | Stretch—release<br>cycle  | 0<br>(Pristine)         |       | 100,000 |       |
|--------------------------|---------------------------|-------------------------|-------|---------|-------|
|                          |                           | Applied strain          | 0%    | 50%     | 100%  |
| 0                        | $\Delta R/R_0$            | 0                       | 0.051 | 0.125   | 0.158 |
|                          | Response time<br>(ms)     | 416                     | 416   | 416     | 486   |
|                          | Elongation (%)            | 1,600<br>( $\pm 21.3$ ) | 1,590 | 1,586   | 1,262 |
|                          | Tensile strength<br>(kPa) | 95 ( $\pm 4.3$ )        | 80    | 67      | 89    |
| 12                       | $\Delta R/R_0$            | —                       | 0.009 | 0.011   | 0.012 |
|                          | Response time<br>(ms)     | —                       | 416   | 416     | 416   |
|                          | Elongation (%)            | —                       | 1,608 | 1,615   | 1,614 |
|                          | Tensile strength<br>(kPa) | —                       | 98    | 94      | 92    |

**Table S17.** Relative resistance change, response time, and mechanical properties of the uncut DMC 3 sensor during self-healing following 100,000 fatigue cycles under various strains at 1 Hz

| Self-healing time (h) | Stretch–release cycle  | 0 (Pristine)       |       | 100,000 |       |       |
|-----------------------|------------------------|--------------------|-------|---------|-------|-------|
|                       |                        | Applied strain     | 0%    | 50%     | 100%  | 150%  |
| 0                     | $\Delta R/R_0$         | 0                  | 0.048 | 0.098   | 0.156 | 0.646 |
|                       | Response time (ms)     | 416                | 416   | 416     | 416   | 416   |
|                       | Elongation (%)         | 3,065 ( $\pm 53$ ) | 3,022 | 3,011   | 3,008 | 2,634 |
|                       | Tensile strength (kPa) | 142 ( $\pm 3.1$ )  | 116   | 115     | 101   | 93    |
| 6                     | $\Delta R/R_0$         | —                  | 0.028 | 0.048   | 0.096 | 0.164 |
|                       | Response time (ms)     | —                  | 416   | 416     | 416   | 416   |
|                       | Elongation (%)         | —                  | 3,035 | 3,045   | 3,037 | 3,013 |
|                       | Tensile strength (kPa) | —                  | 135   | 126     | 122   | 125   |
| 12                    | $\Delta R/R_0$         | —                  | 0.009 | 0.011   | 0.012 | 0.032 |
|                       | Response time (ms)     | —                  | 416   | 416     | 416   | 416   |
|                       | Elongation (%)         | —                  | 3,064 | 3,059   | 3,042 | 3,119 |
|                       | Tensile strength (kPa) | —                  | 147   | 146     | 148   | 141   |

**Table S18.** Crack length (mm) of precut sensors during cyclic stretching

(mm)

| Sample                | IC   |      |      |    | DIC  |      |      |      |
|-----------------------|------|------|------|----|------|------|------|------|
| Stretch ( $\lambda$ ) | 1.25 | 1.5  | 1.75 | 2  | 1.25 | 1.5  | 1.75 | 2    |
| Cycle                 |      |      |      |    |      |      |      |      |
| <b>0</b>              | 10   | 10   | 10   | 10 | 10   | 10   | 10   | 10   |
| <b>1,000</b>          | 10   | 10.5 | 10.5 | 12 | 10   | 10.1 | 10.1 | 10.7 |
| <b>2,000</b>          | 10   | 10.5 | 11   | 13 | 10   | 10.2 | 10.4 | 11.2 |
| <b>3,000</b>          | 10   | 10.5 | 11.5 | 14 | 10   | 10.2 | 10.8 | 11.6 |
| <b>4,000</b>          | 10   | 10.5 | 12.2 | 15 | 10   | 10.3 | 11.1 | 11.9 |
| <b>5,000</b>          | 10   | 10.5 | 12.3 | 16 | 10   | 10.3 | 11.4 | 12.4 |
| <b>6,000</b>          | 10   | 11   | 12.6 | 17 | 10   | 10.3 | 11.6 | 12.6 |
| <b>7,000</b>          | 10   | 11   | 12.8 | 18 | 10   | 10.4 | 11.7 | 12.6 |
| <b>8,000</b>          | 10   | 11   | -    | -  | 10   | 10.4 | 11.9 | 12.6 |
| <b>9,000</b>          | 10   | 11   | -    | -  | 10   | -    | -    | -    |
| <b>10,000</b>         | 10   | 11   | -    | -  | 10   | -    | -    | -    |

| Sample                | MC 3 |      |      |      | DMC 3 |      |      |      |
|-----------------------|------|------|------|------|-------|------|------|------|
| Stretch ( $\lambda$ ) | 1.25 | 1.5  | 1.75 | 2    | 1.25  | 1.5  | 1.75 | 2    |
| Cycle                 |      |      |      |      |       |      |      |      |
| <b>0</b>              | 10   | 10   | 10   | 10   | 10    | 10   | 10   | 10   |
| <b>1,000</b>          | 10   | 10   | 11   | 14.5 | 10    | 10.1 | 10.7 | 10.8 |
| <b>2,000</b>          | 10   | 10   | 11   | 17   | 10    | 10.2 | 11.2 | 11.3 |
| <b>3,000</b>          | 10   | 10   | 11.5 | 19   | 10    | 10.3 | 11.7 | 12.2 |
| <b>4,000</b>          | 10   | 10   | 12   | 20   | 10    | 10.4 | 11.8 | 13.1 |
| <b>5,000</b>          | 10   | 10.5 | 13   | 22   | 10    | 10.4 | 12.1 | 13.2 |
| <b>6,000</b>          | 10   | 10.5 | 13.5 | 24   | 10    | 10.5 | 12.2 | 13.2 |
| <b>7,000</b>          | 10   | 10.5 | 13.5 | 27   | 10    | 10.5 | 12.5 | 13.3 |
| <b>8,000</b>          | 10   | 10.5 | 13.5 | 30   | 10    | 10.5 | 12.5 | 13.3 |
| <b>9,000</b>          | 10   | 10.5 | 13.5 | -    | 10    | -    | -    | -    |
| <b>10,000</b>         | 10   | 10.5 | 13.5 | -    | 10    | -    | -    | -    |

**Table S19.** Crack extension rate ( $\Delta c/\Delta N$ ) for uncut and precut sensors under cyclic stretching

| Stretch ( $\lambda$ ) |             | Crack Extension rate $\Delta c/\Delta N$ ( $\mu\text{m}/\text{cycle}$ ) |       |       |       |
|-----------------------|-------------|-------------------------------------------------------------------------|-------|-------|-------|
|                       |             | IC                                                                      | DIC   | MC3   | DMC3  |
| <b>Non-notch</b>      | <b>1.5</b>  | 0                                                                       | 0     | 0     | 0     |
| <b>Single notch</b>   | <b>1.25</b> | 0                                                                       | 0     | 0     | 0     |
|                       | <b>1.5</b>  | 0.167                                                                   | 0.055 | 0.033 | 0.085 |
|                       | <b>1.75</b> | 0.464                                                                   | 0.252 | 0.561 | 0.443 |
|                       | <b>2</b>    | 1.5                                                                     | 0.440 | 2.833 | 0.673 |



**Table S20.** Energy release rate (G) for uncut and precut sensors under cyclic stretching

| Stretch ( $\lambda$ ) |             | Energy release rate, G ( $\text{J/m}^2$ ) |       |        |        |
|-----------------------|-------------|-------------------------------------------|-------|--------|--------|
|                       |             | IC                                        | DIC   | MC3    | DMC3   |
| <b>Non-notch</b>      | <b>1.5</b>  | 35.10                                     | 33.51 | 56.55  | 57.50  |
| <b>Notch</b>          | <b>1.25</b> | 16.77                                     | 18.02 | 26.52  | 35.64  |
|                       | <b>1.5</b>  | 38.45                                     | 45.66 | 64.49  | 84.69  |
|                       | <b>1.75</b> | 68.16                                     | 85.85 | 113.24 | 115.34 |
|                       | <b>2</b>    | 106.78                                    | 93.99 | 189.87 | 127.63 |

**Table S21.** Summary of electrical and mechanical properties of eutectogel sensors

|                                                           | IC         | MC 3  | DMC 3  |       |
|-----------------------------------------------------------|------------|-------|--------|-------|
| <b>Tensile strength (kPa)</b>                             | 90         | 95    | 142    |       |
| <b>Elongation (%)</b>                                     | 1,038      | 1,600 | 3,065  |       |
| <b>Elastic Modulus (kPa)</b>                              | 11         | 17    | 26     |       |
| <b>Sensitivity [= GF] (%)</b>                             | 1.47       | 1.97  | 3.91   |       |
| <b>Electromechanical hysteresis at 100% strain (%)</b>    | 7.5        | 1.5   | 0.3    |       |
| <b>Toughness (J/m<sup>2</sup>)</b>                        | 4,429      | 8,808 | 20,337 |       |
| <b>Fatigue threshold, G<sub>c</sub> (J/m<sup>2</sup>)</b> | 26.6       | 56.7  | 83.4   |       |
|                                                           | No fatigue | 495   | 1,005  | 3,085 |
| <b>Work of fracture (kJ/m<sup>3</sup>)</b>                | 0 h*       | 150   | 775    | 1,547 |
|                                                           | 6 h**      | -     | -      | 2,385 |
|                                                           | 12 h***    | 295   | 1,043  | 3,060 |

\*: Tensile tests were performed on IC, MC 3, and DMC 3 samples immediately after 100,000 cycles of fatigue testing at strains of 50%, 150%, and 200%, respectively.

\*\* : Tensile tests were performed on IC, MC 3, and DMC 3 samples after 6 hours of self-healing following 100,000 cycles of fatigue testing at strains of 50%, 150%, and 200%, respectively.

\*\*\*: Tensile tests were performed on IC, MC 3, and DMC 3 samples after 12 hours of self-healing following 100,000 cycles of fatigue testing at strains of 50%, 150%, and 200%, respectively.

**Table S22.** Comparison of fatigue life cycles between the present study and previously reported stretchable sensors under cyclic stretching in the uncut condition

| Material                                        | Elongation at break (%) | Max. GF | Response time (ms)      | Fatigue life cycle (strain) | Suppl. Ref. |
|-------------------------------------------------|-------------------------|---------|-------------------------|-----------------------------|-------------|
| DMC 3                                           | 3,050                   | 3.91    | 84(4.33Hz)<br>416(1 Hz) | >100,000<br>(200%)          | This work   |
|                                                 |                         |         |                         | 46,177<br>(250%)            |             |
|                                                 |                         |         |                         | 30,217<br>(300%)            |             |
| MC 3                                            | 1,600                   | 2.67    | 94(4.33Hz)<br>416(1 Hz) | >100,000<br>(150%)          | This work   |
|                                                 |                         |         |                         | 44,797<br>(200%)            |             |
|                                                 |                         |         |                         | 12,098<br>(250%)            |             |
|                                                 |                         |         |                         | 7,417<br>(300%)             |             |
| IC                                              | 1,038                   | 1.47    | 94(4.33Hz)<br>486(1 Hz) | >100,000<br>(50%)           | This work   |
|                                                 |                         |         |                         | 8,409<br>(100%)             |             |
|                                                 |                         |         |                         | 5,929<br>(150%)             |             |
| ChCl/AA/PEDOT:PSS eutectogel                    | 802                     | 4.48    | 61                      | 11,300<br>(50%)             | [1]         |
|                                                 |                         |         |                         | 4,799<br>(100%)             |             |
|                                                 |                         |         |                         | 2,399<br>(150%)             |             |
| H-ChCl/AA/PEDOT:PSS eutectogel                  | 964                     | 3.15    | 40                      | 100,000<br>(50%)            | [1]         |
|                                                 |                         |         |                         | 60,000<br>(100%)            |             |
|                                                 |                         |         |                         | 5,949<br>(150%)             |             |
| PAAM/SA/MXene/PEDOT :PSS nanocomposite hydrogel | 1,350                   | 1.99    | 624                     | 600<br>(50%)                | [13]        |

|                                                                    |       |                     |       |                  |      |
|--------------------------------------------------------------------|-------|---------------------|-------|------------------|------|
| PAM/HPMC/PEDOT:PSS<br>polymer hydrogel                             | 1,640 | 17.58               | 150   | 300<br>(100%)    | [14] |
| PAM/CCMF/PEDOT:PSS<br>composite hydrogel                           | 837   | 0.31                | 400   | 1,100<br>(300%)  | [15] |
| PAA-Al <sup>3+</sup> /PEDOT:PSS/ZB<br>polymer hydrogel             | 1,457 | 1.32                | -     | 150<br>(100%)    | [16] |
| Gr/PEDOT:PSS/MnO <sub>2</sub><br>NWs nanocomposites                | 320   | 1.2                 | 79    | 5,000<br>(100%)  | [17] |
| PDMS/CNT<br>nanocomposites                                         | 100   | 3.1                 | -     | 5,000<br>(100%)  | [18] |
| AgNPs/CNTs/PDA-TPU<br>mat                                          | 640   | 2 × 10 <sup>6</sup> | -     | 1,000<br>(200%)  | [19] |
| SA/LM/Amm ionic<br>hydrogel                                        | 1,348 | 0.6                 | 200   | 350<br>(200%)    | [20] |
| PEDOT:PSS@CB/CNT-<br>TPU membrane                                  | 910   | 5.6                 | 2,300 | 4,000<br>(25%)   | [21] |
| PVA/MWCNT/PEDOT:PSS<br>nanocomposites on PDMS                      | 50    | 5.2                 | 20    | 10,000<br>(10%)  | [22] |
| CNTs/PDA/Elastic Bands                                             | 920   | 129.2               | 220   | 10,000<br>(100%) | [23] |
| Ti <sub>3</sub> C <sub>2</sub> T <sub>x</sub> on PDMS              | 53    | 178.4               | 130   | 5,000<br>(20%)   | [24] |
| PVA/PEDOT:PSS<br>elastomer                                         | 30    | 110                 | 40    | 400<br>(20%)     | [25] |
| Ti <sub>3</sub> C <sub>2</sub> T <sub>x</sub> -graphene on<br>PDMS | 74.1  | 190.8               | 130   | 10,000<br>(40%)  | [26] |
| Graphene nanoplatelets-<br>AgNWs on PDMS                           | 22    | 41.5                | 50    | 1,000<br>(10%)   | [27] |
| rGO-TPU fiber mat                                                  | 200   | 79                  | 200   | 6,000<br>(50%)   | [28] |
| CBs/CNTs nanocomposites                                            | 50    | 2.18                | 125   | 1,000<br>(15%)   | [29] |
| GWF (Graphene woven<br>fabric)                                     | 3     | 223                 | 72    | 1,000<br>(3%)    | [30] |

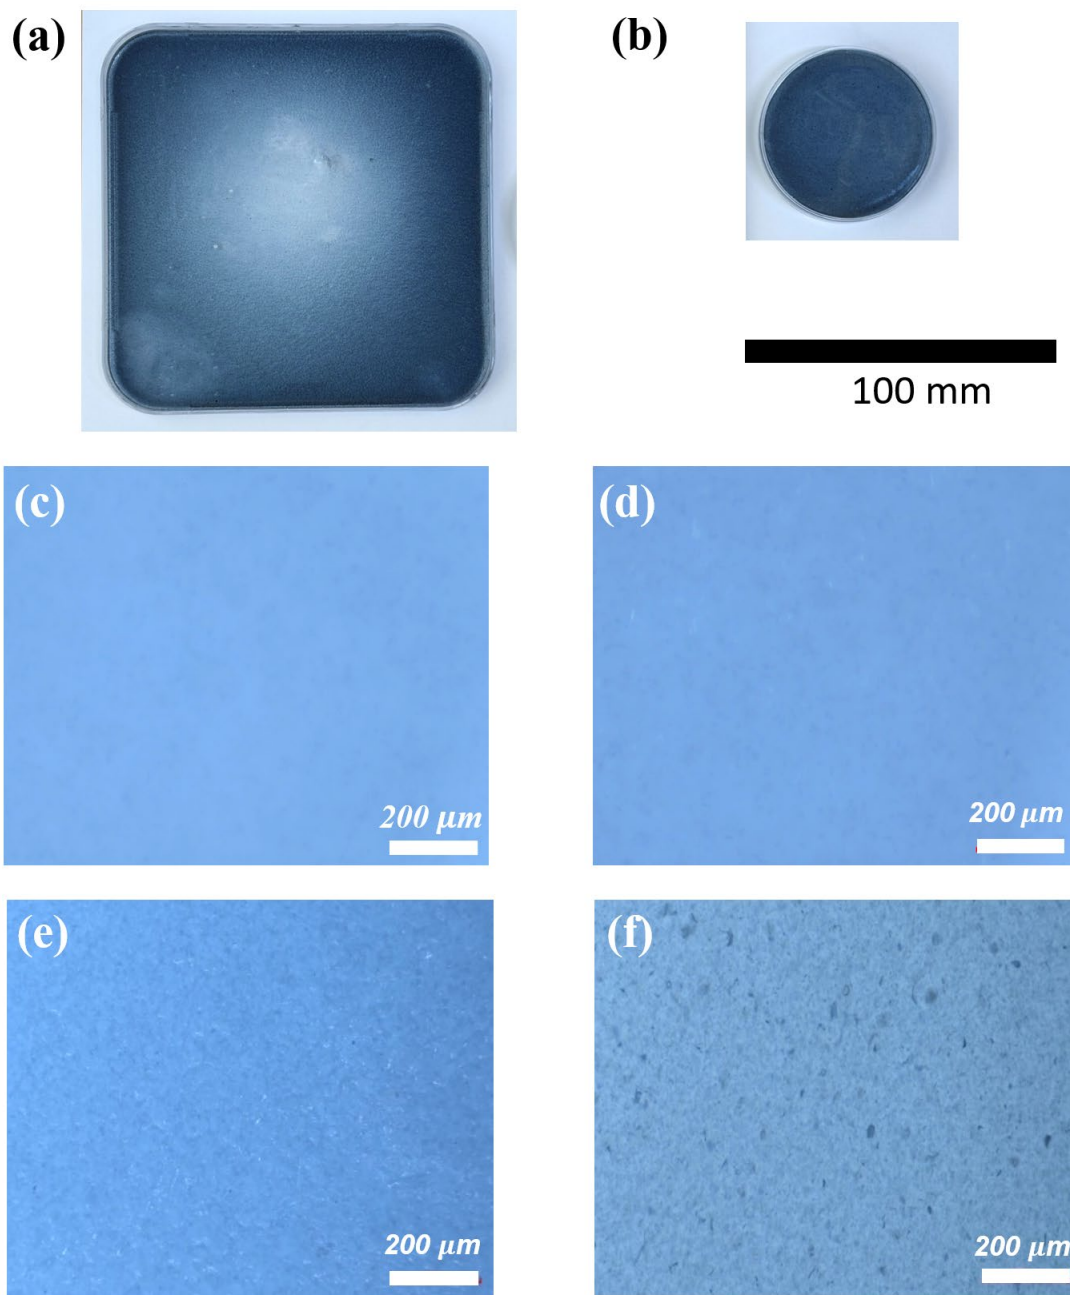

**Figure S1.** Photographs of fabricated eutectogels (DMC 3) in various shapes and sizes: (a) square ( $125 \times 125$  mm) and (b) circular ( $\phi 58$  mm). Optical microscope images of MC-type conductors (MC 1–4) with varying PEDOT:PSS contents: (c) 4.1 wt%, (d) 5.2 wt%, (e) 7.0 wt%, and (f) 8.0 wt%.

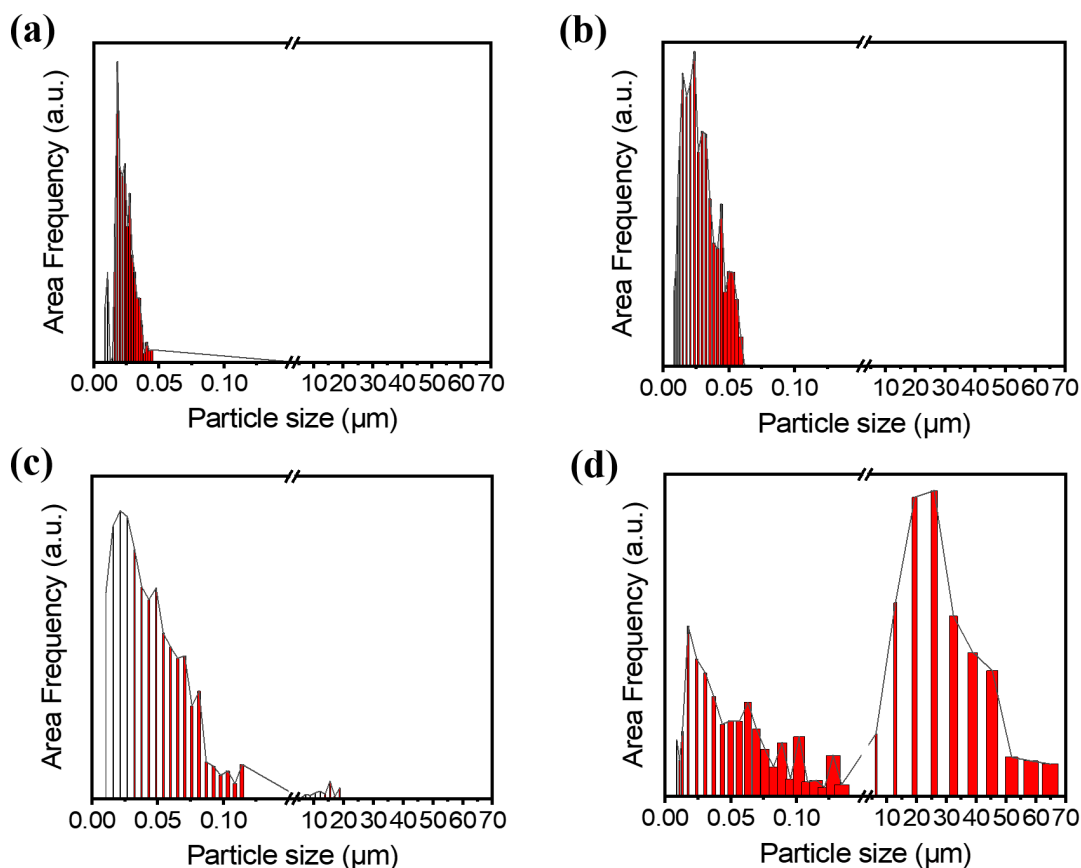

**Figure S2.** Particle size distribution of DMC conductors (DMC 1–4) with increasing PEDOT:PSS contents: (a) 4.1 wt%, (b) 5.2 wt%, (c) 7.0 wt%, and (d) 8.0 wt%..

Panels (a) and (b) show monomodal distributions with area-weighted average particle sizes of approximately 17 nm, indicating well-dispersed PEDOT:PSS domains in DMC 1 and DMC 2. Panel (c), corresponding to DMC 3 (7.0 wt%), exhibits a bimodal distribution consisting of a dominant nanoparticle population (mean diameter: 20.8 nm) and a minor fraction of micron-sized aggregates ( $\sim 8.8 \mu\text{m}$ ), marking the onset of aggregation. In panel (d), representing DMC 4 (8.0 wt%), the morphology is dominated by large PEDOT:PSS aggregates with an average size of  $16.2 \mu\text{m}$  and a subpopulation of 17 nm particles, with an approximate 2:1 area frequency ratio (aggregates:nanoparticles). These results support the interpretation of a percolation threshold at 7.0 wt% and aggregation-induced network collapse beyond 8.0 wt%, as discussed in the main text and Fig. 3a.

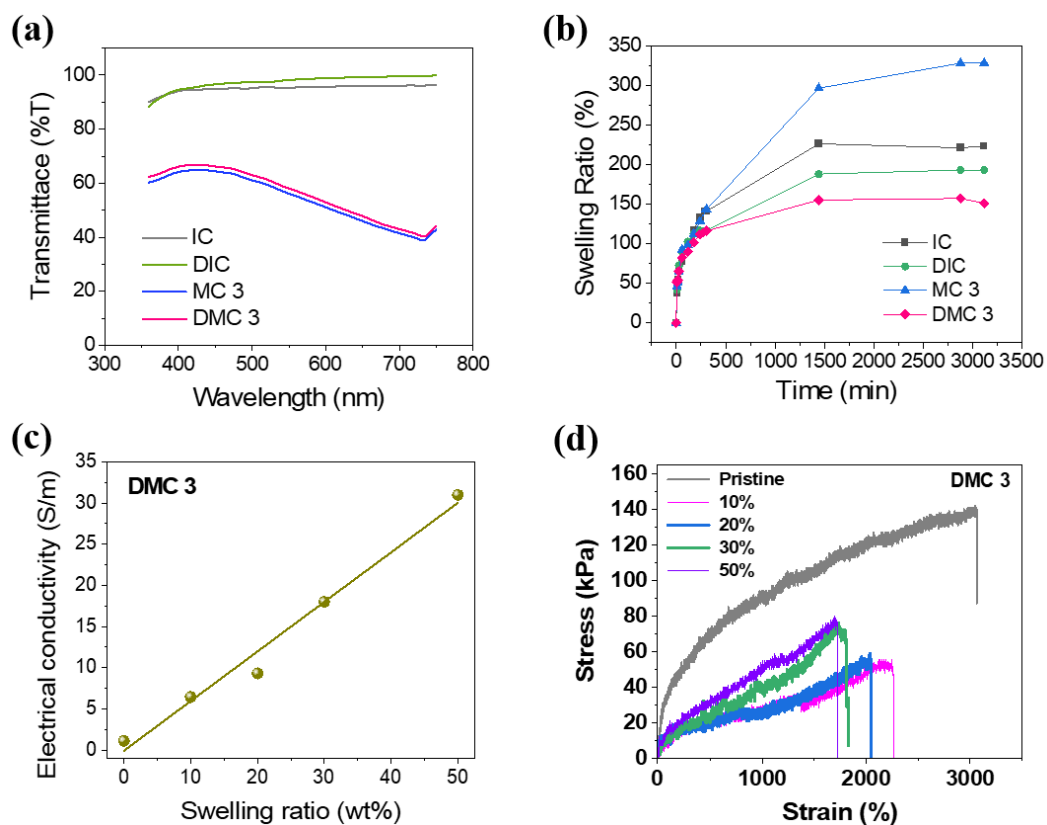

**Figure S3.** (a) Optical transmittance of eutectogel conductors; (b) Swelling ratio of eutectogel conductors as a function of time (c) Electrical conductivity of DMC 3 as a function of swelling ratio measured by the four-point probe method; (d) Stress-strain curves of DMC 3 at various swelling ratios.

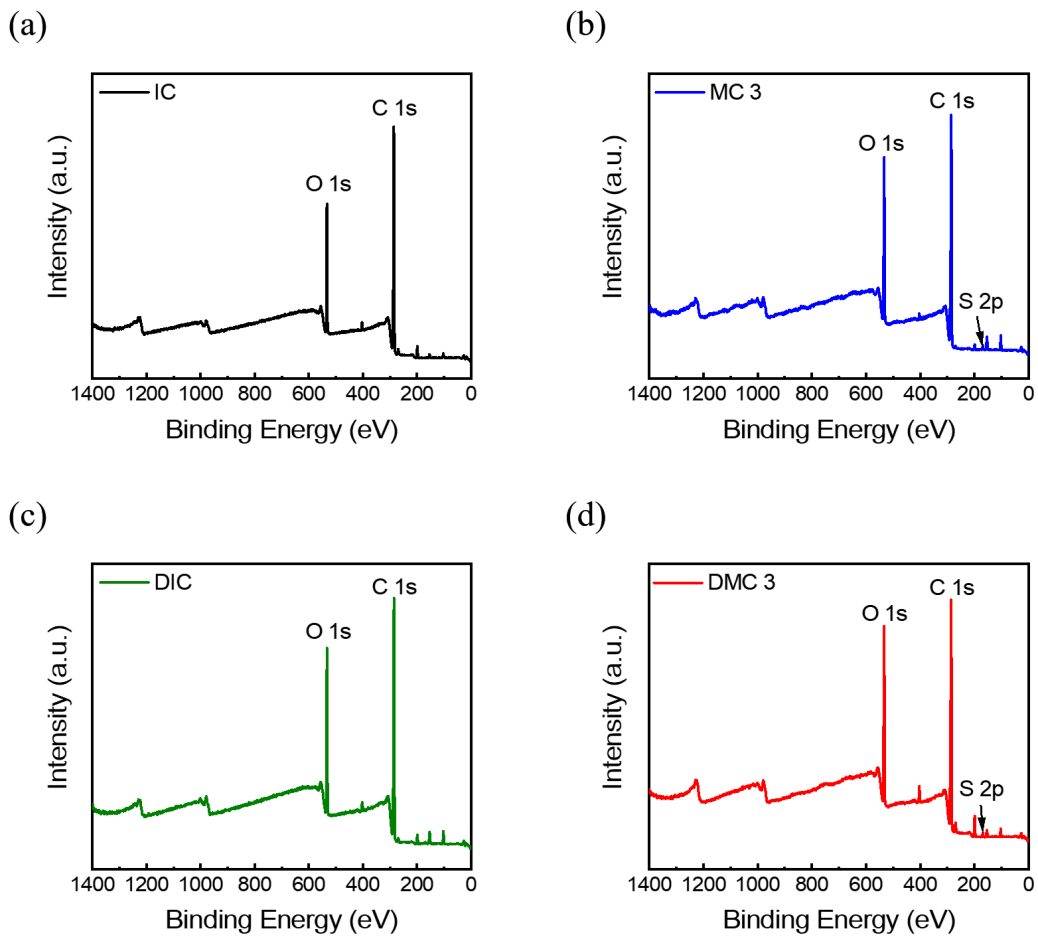

**Figure S4.** XPS spectra of (a) IC, (b) MC 3, (c) DIC, and (d) DMC 3 sensors.



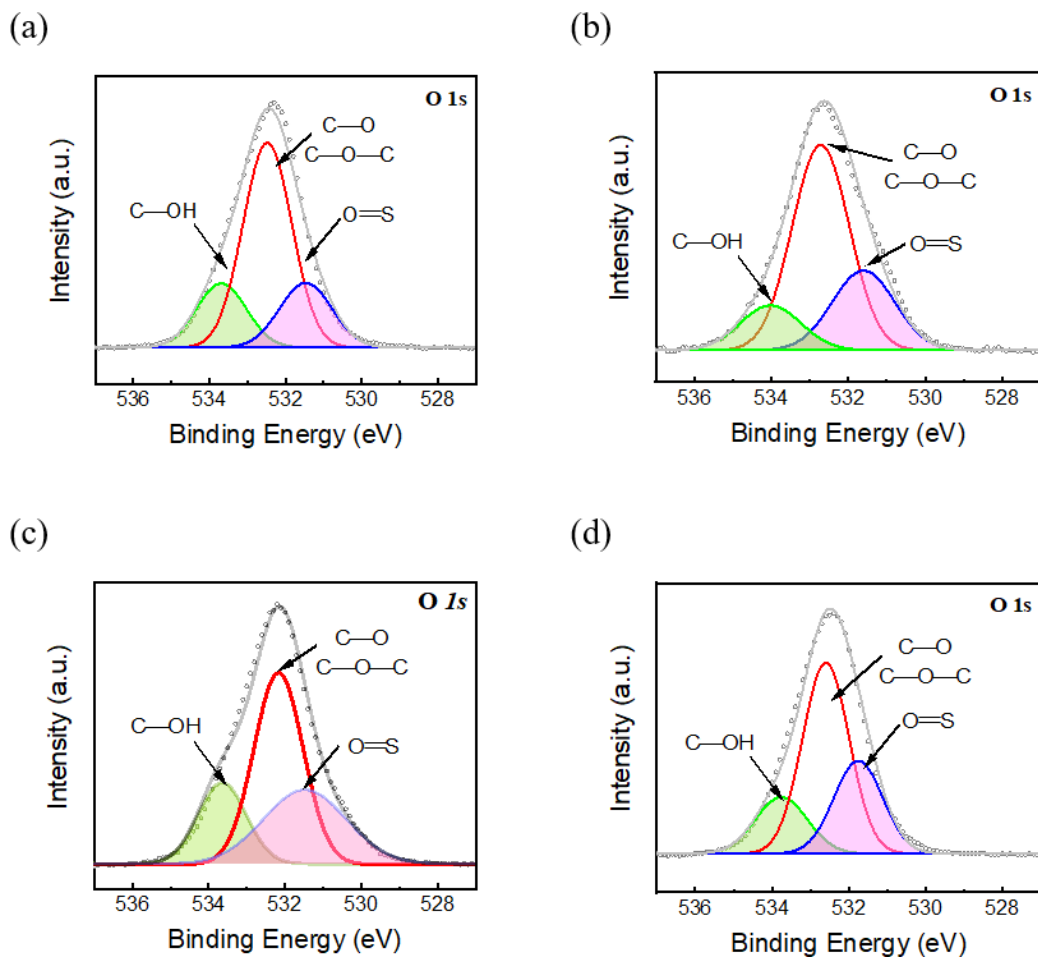

**Figure S5.** XPS  $O 1s$  spectra of (a) MC 1, (b) MC 2, (c) MC 3, and (d) MC 4 sensors.

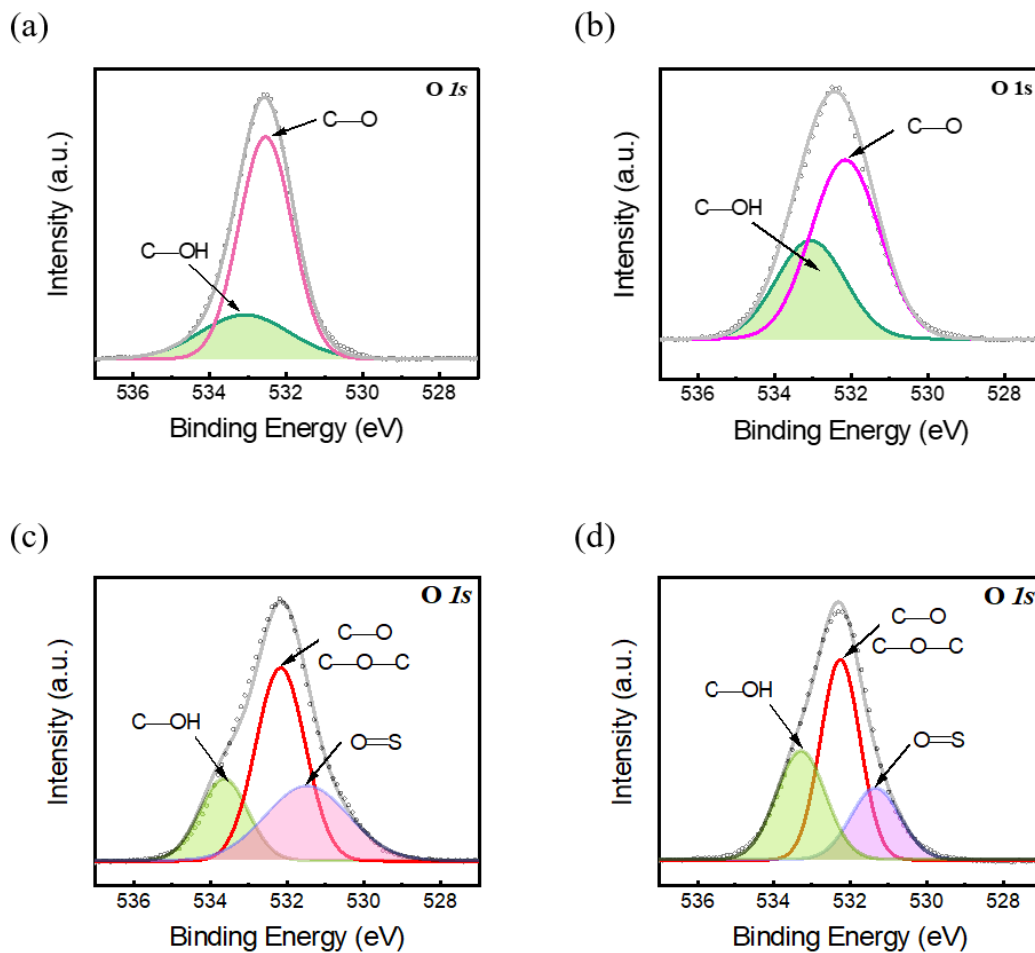

**Figure S6.** XPS  $O 1s$  spectra of (a) IC, (b) DIC, (c) MC 3, and (d) DMC 3 sensors.

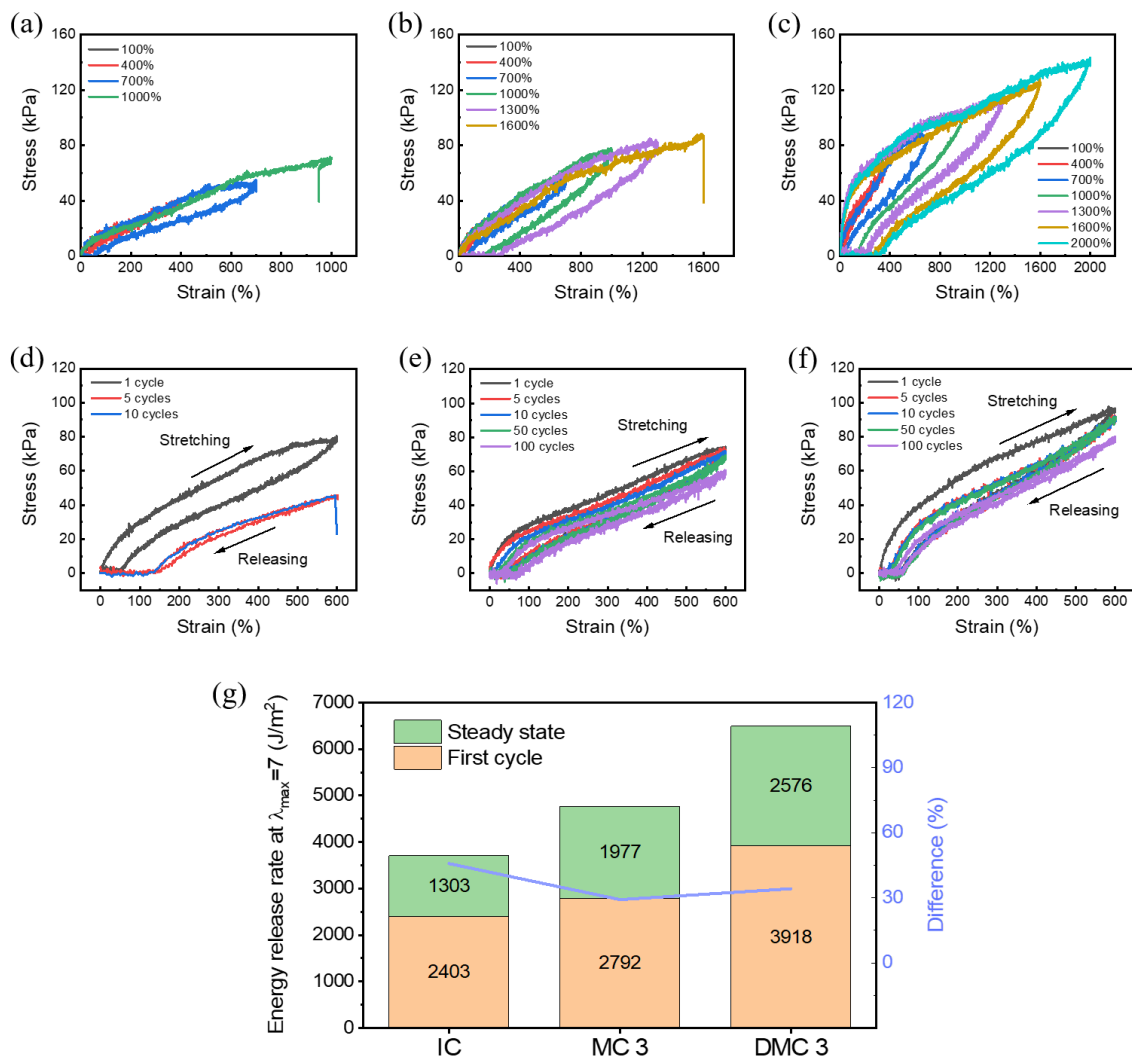

**Figure S7.** Mechanical hysteresis of (a) IC, (b) MC 3, (c) DMC 3 sensors under different strains at 1 Hz. Mechanical hysteresis across various stretch-relaxation cycles for (d) IC, (e) MC 3, and (f) DMC 3 under 600% strain ( $\lambda_{\max}=7$ ). (g) Energy release rate of uncut sensors in the initial and steady state cycles at  $\lambda_{\max}=7$ .

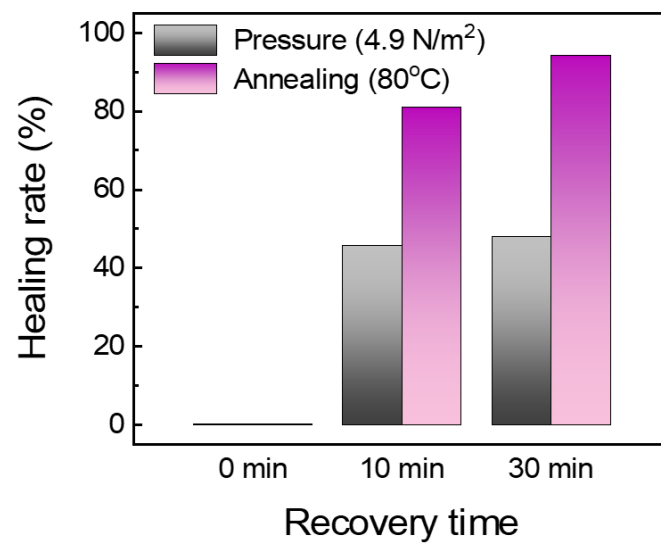

**Figure S8.** Enhanced healing efficiency of DMC 3 under both physical compression and thermal annealing conditions.

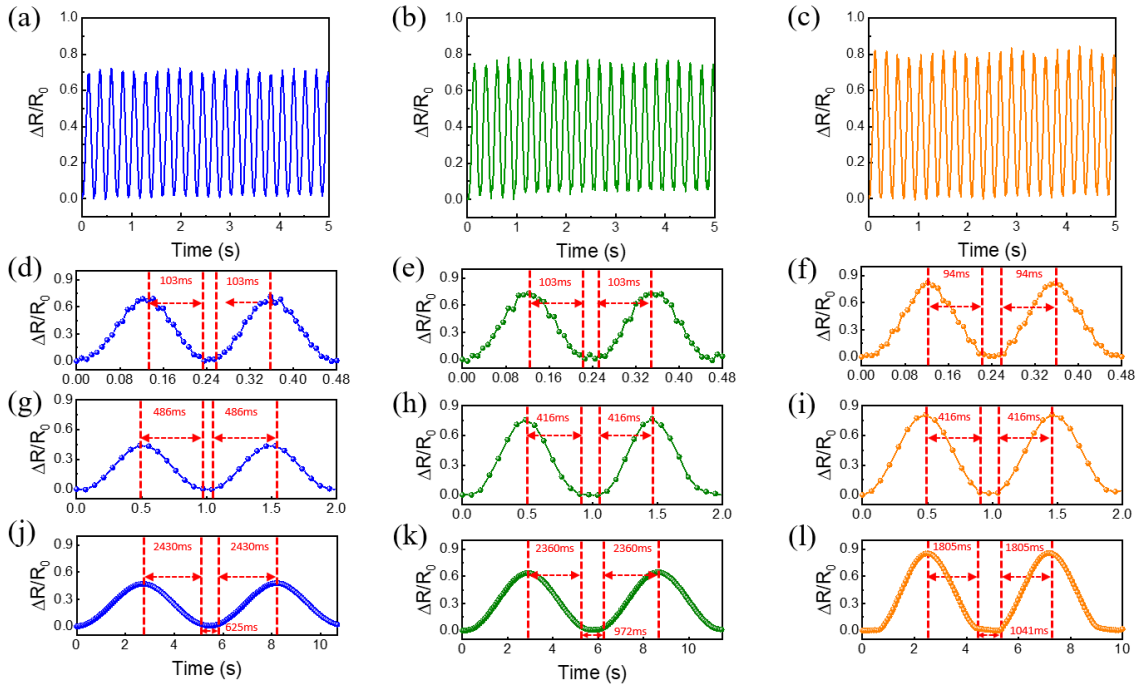

**Figure S9.** Response signals of the sensors during cyclic stretch–release motions at 50% strain under different strain rates: (a, d) IC, (b, e) MC 3, and (c, f) DMC 3 at 4.33Hz; (g) IC, (h) MC 3, and (i) DMC 3 at 1 Hz; (j) IC, (k) MC 3, and (l) DMC 3 at 0.17 Hz.

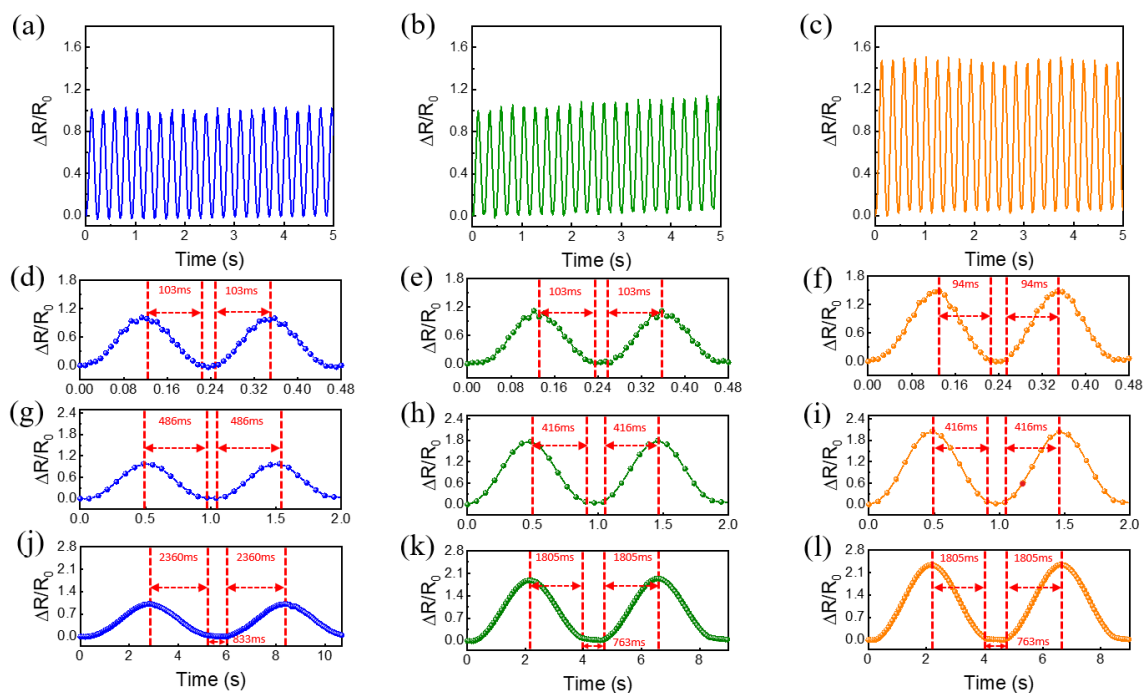

**Figure S10.** Response signals of the sensors during cyclic stretch–release motions at 100% strain under different strain rates: (a, d) IC, (b, e) MC 3, and (c, f) DMC 3 at 4.33Hz; (g) IC, (h) MC 3, and (i) DMC 3 at 1 Hz; (j) IC, (k) MC 3, and (l) DMC 3 at 0.17 Hz.

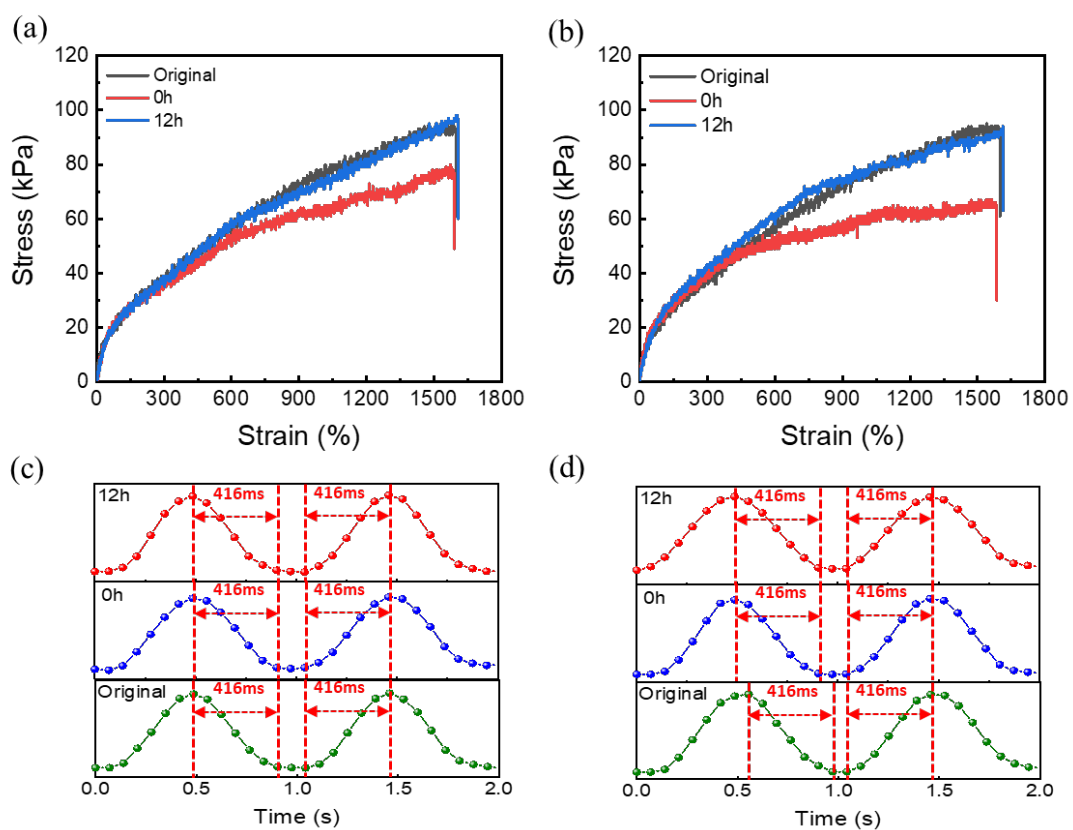

**Figure S11.** Stress–strain curves and response signals of the uncut MC 3 sensor after autonomous recovery following 100,000 cycles at 1 Hz under strains of (a, c) 50% and (b, d) 100% strain.

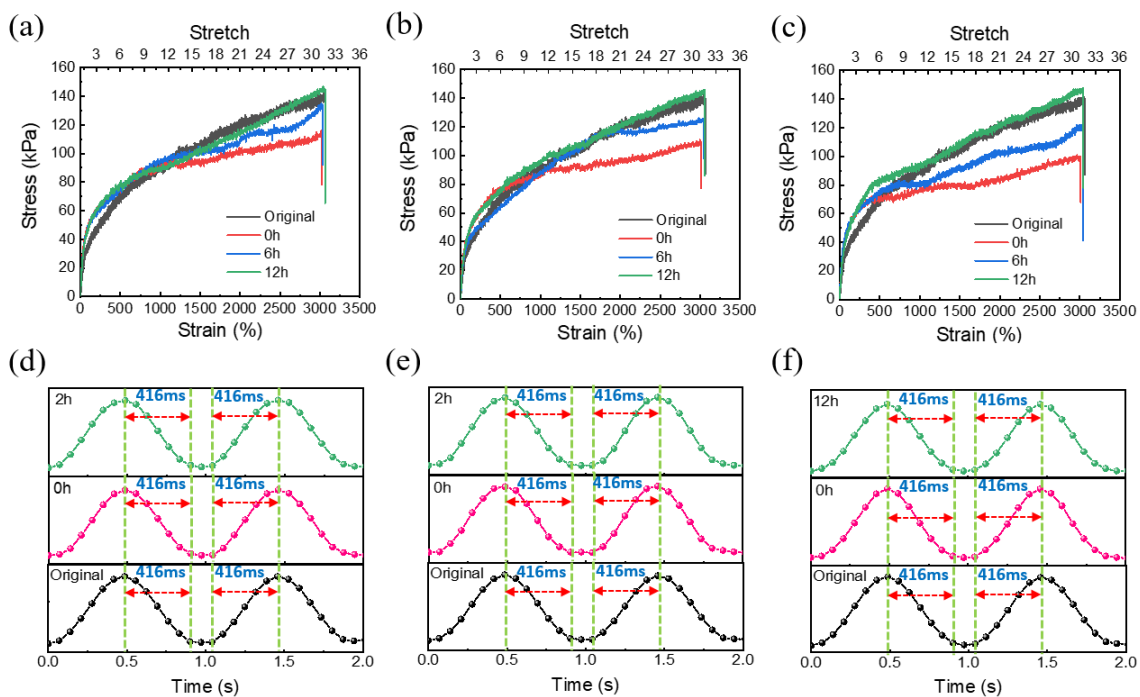

**Figure S12.** Stress–strain curves and response signals of the uncut DMC 3 sensor after autonomous recovery following 100,000 stretch–release cycles at 1 Hz under strains of (a, c) 50%, (b, d) 100%, and (e, f) 150%.



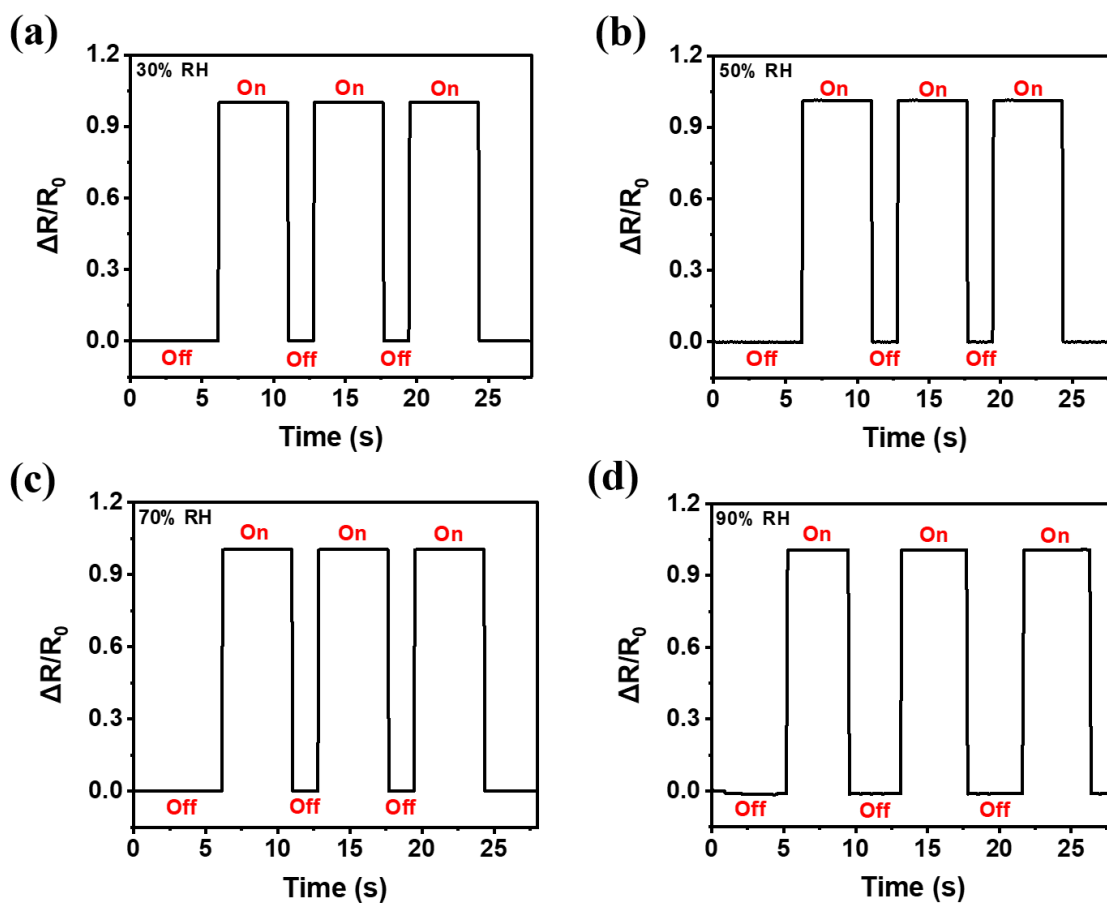

**Figure S13.** Relative resistance changes ( $\Delta R/R_0$ ) of DMC 3 sensors measured at room temperature under varying relative humidity conditions: (a) 30% RH, (b) 50% RH, (c) 70% RH, and (d) 90% RH. The sensors were placed in a temperature-controlled chamber and stabilized at each humidity level for 5 minutes before applying repeated on-off cycles to obtain  $\Delta R/R_0$  from the I-V curve. The measurements indicate minimal resistance variation across the tested humidity range, highlighting the humidity-resistant performance of DMC 3 sensors.

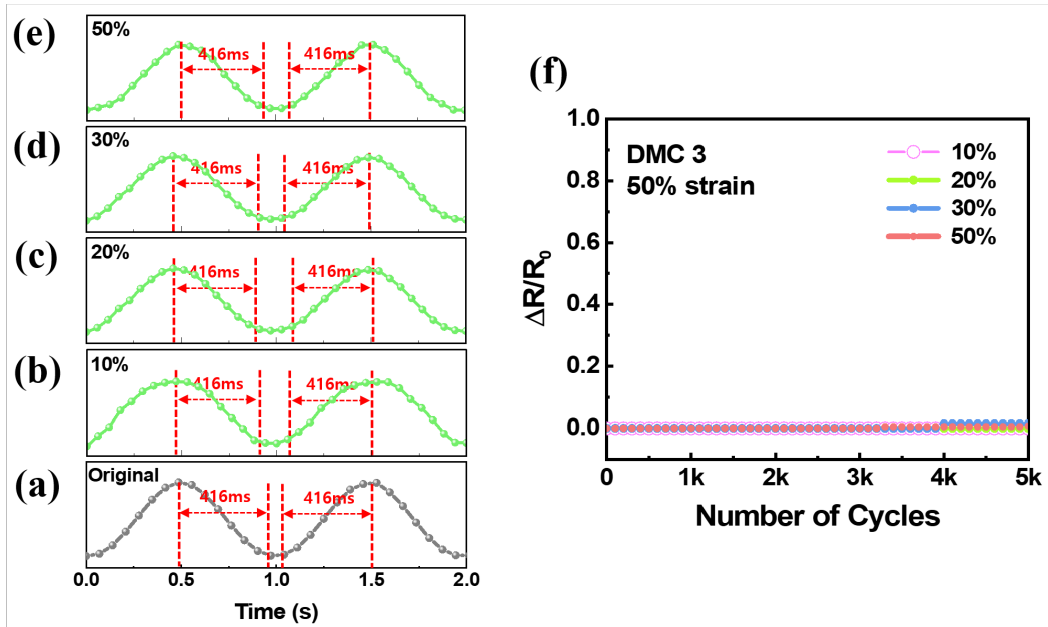

**Figure S14.** Relative resistance changes ( $\Delta R/R_0$ ) of DMC 3 sensors at room temperature under different swelling ratios: (a) original, (b) 10%, (c) 20%, (d) 30%, (e) 50%, and (f)  $\Delta R/R_0$  versus stretching cycles at different swelling ratios.

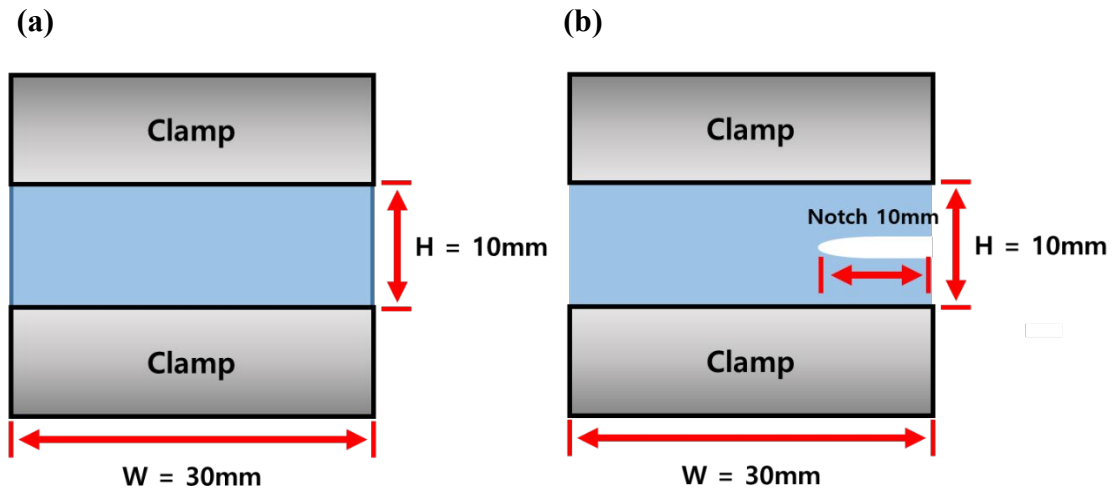

**Figure S15.** Schematic of fatigue cyclic test conditions for (a) uncut and (b) pre-cut sample with single notch. Rectangular samples ( $50 \times 30 \times 1.0 \text{ mm}^3$ ) were clamped in two rigid grips and mounted in a tensile testing machine with a 100 N load cell. The length ( $H = 10 \text{ mm}$ ) and width ( $W = 30 \text{ mm}$ ) of samples in the undeformed state were used for cyclic stretch tests. Fatigue-resistance tests were performed using the single-notch method with a 10 mm pre-cut crack length, subjected to cyclic stretching at maximum stretch ( $\lambda_{\text{max}}$ ) at a crosshead speed of 750 mm/min.

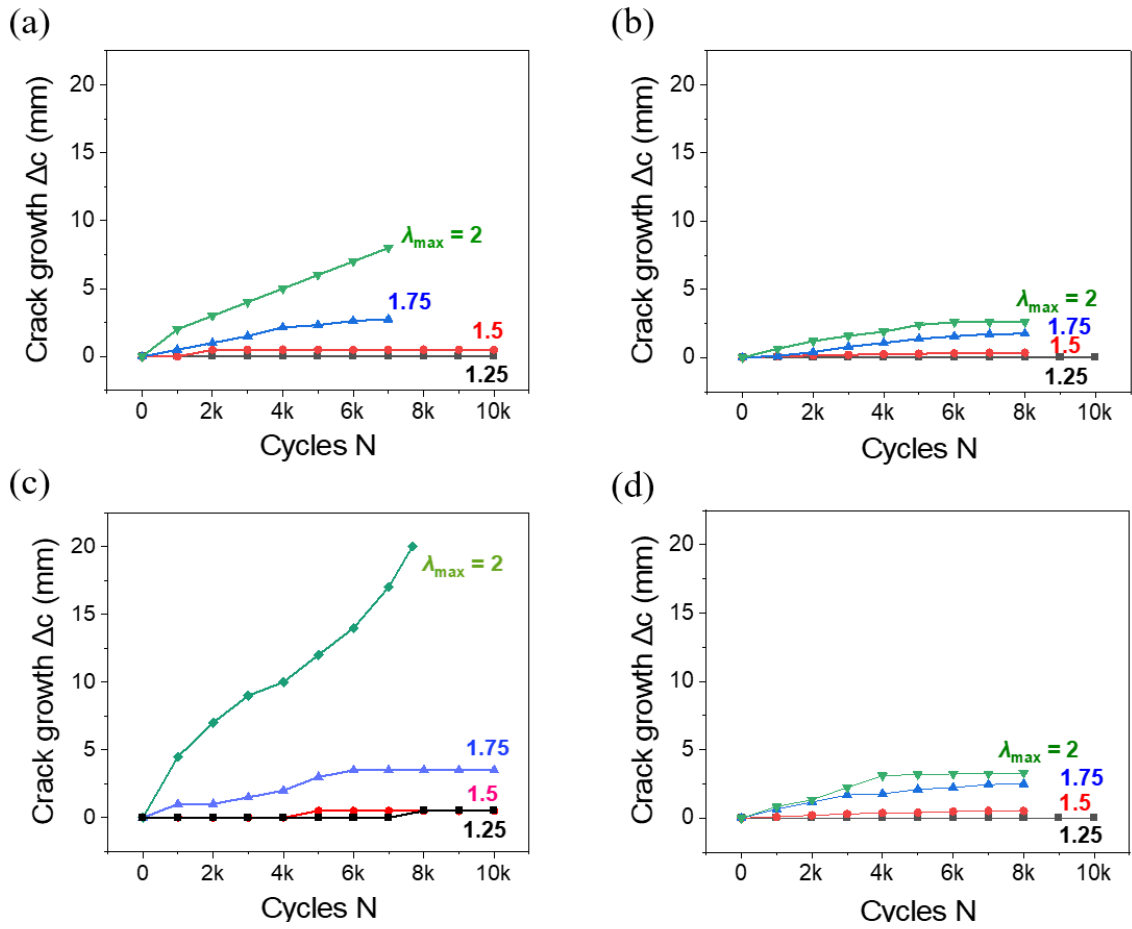

**Figure S16.** Crack growth ( $\Delta c$ ) with fatigue cycles ( $N$ ) at various  $\lambda_{\max}$  levels for single-notch sensors: (a) IC, (b) DIC, (c) MC 3, and (d) DMC 3.

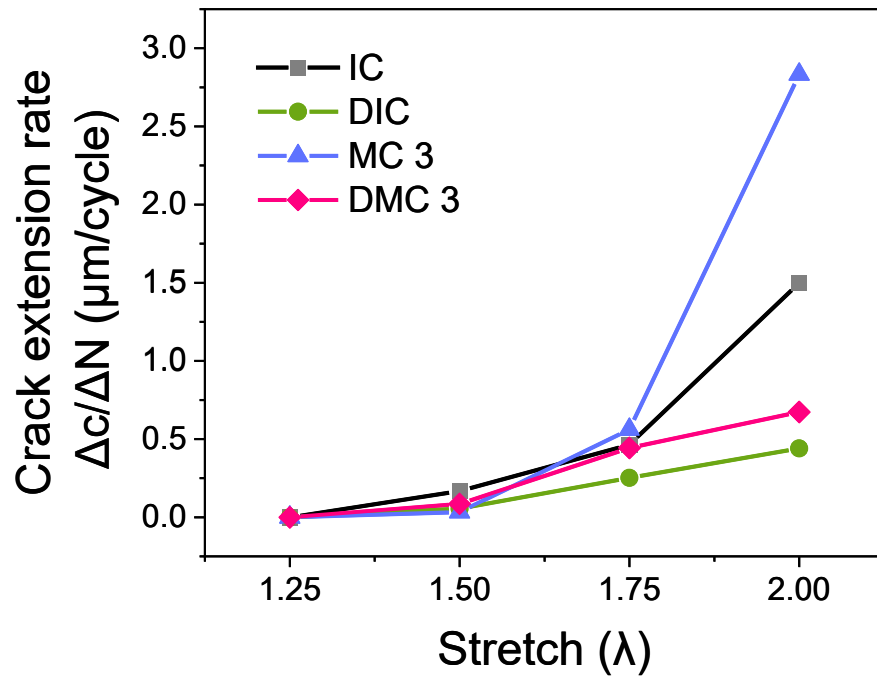

Figure S17. Variation of crack extension rate ( $\Delta c/\Delta N$ ) with stretch ( $\lambda_{\text{max}}$ ) for single-notch sensors.

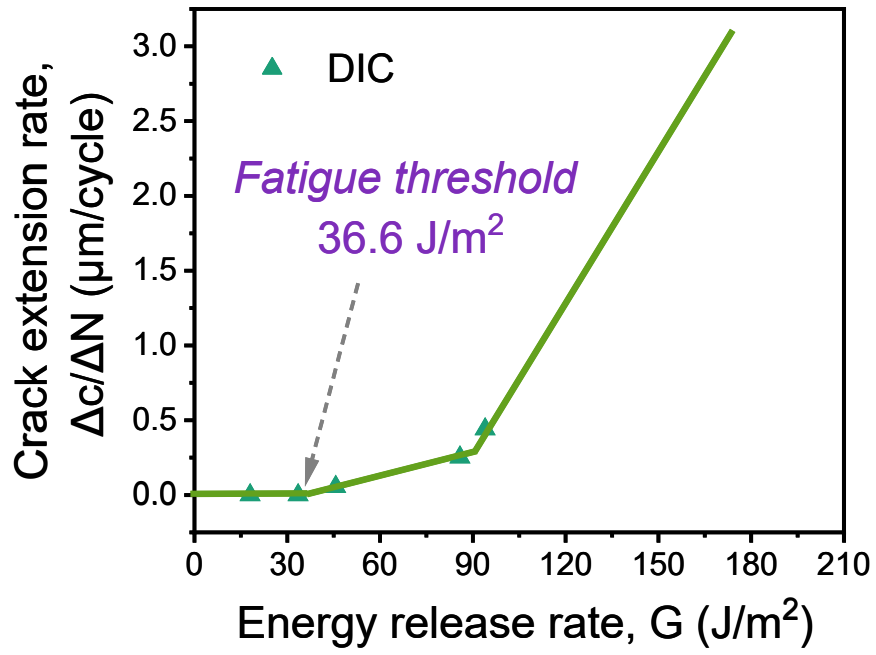

**Figure S18.** Crack extension rate ( $\Delta c/\Delta N$ ) as a function of energy release rate ( $G$ ) and fatigue threshold ( $G_c$ ) for the single-notch DIC sensor.

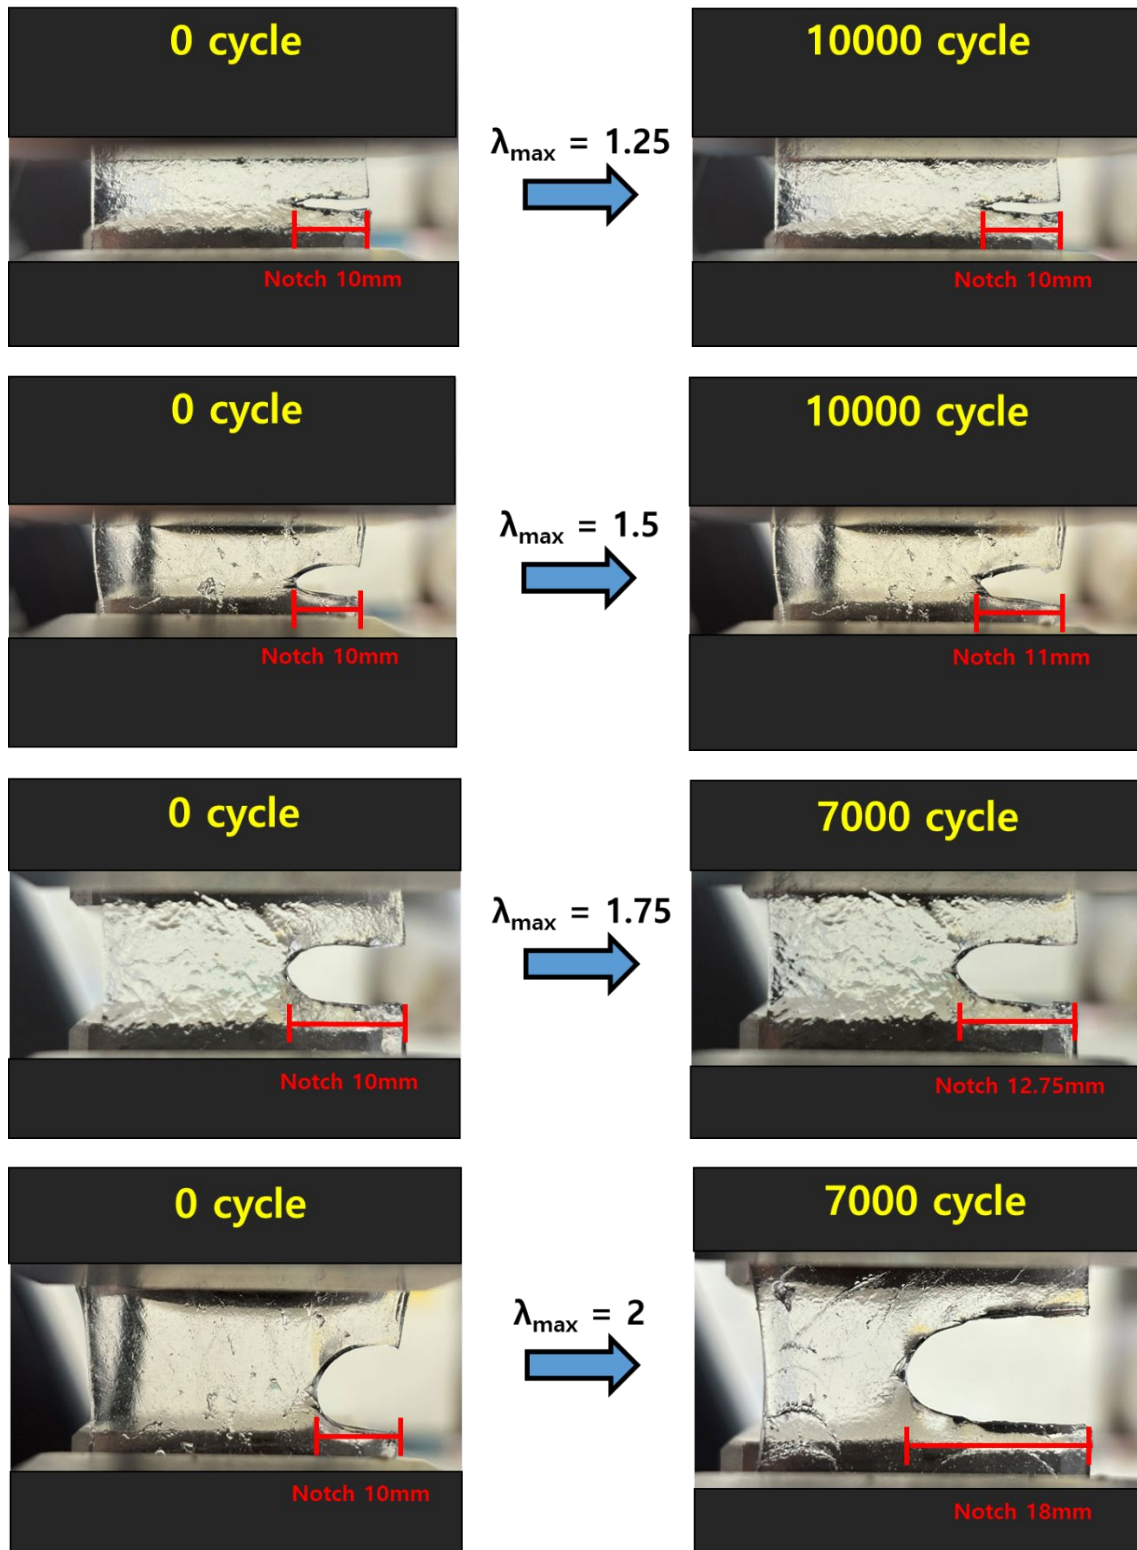

**Figure S19.** Progression of pre-crack length in single-notch IC sensors during fatigue cycling tests at various  $\lambda_{\max}$  levels.

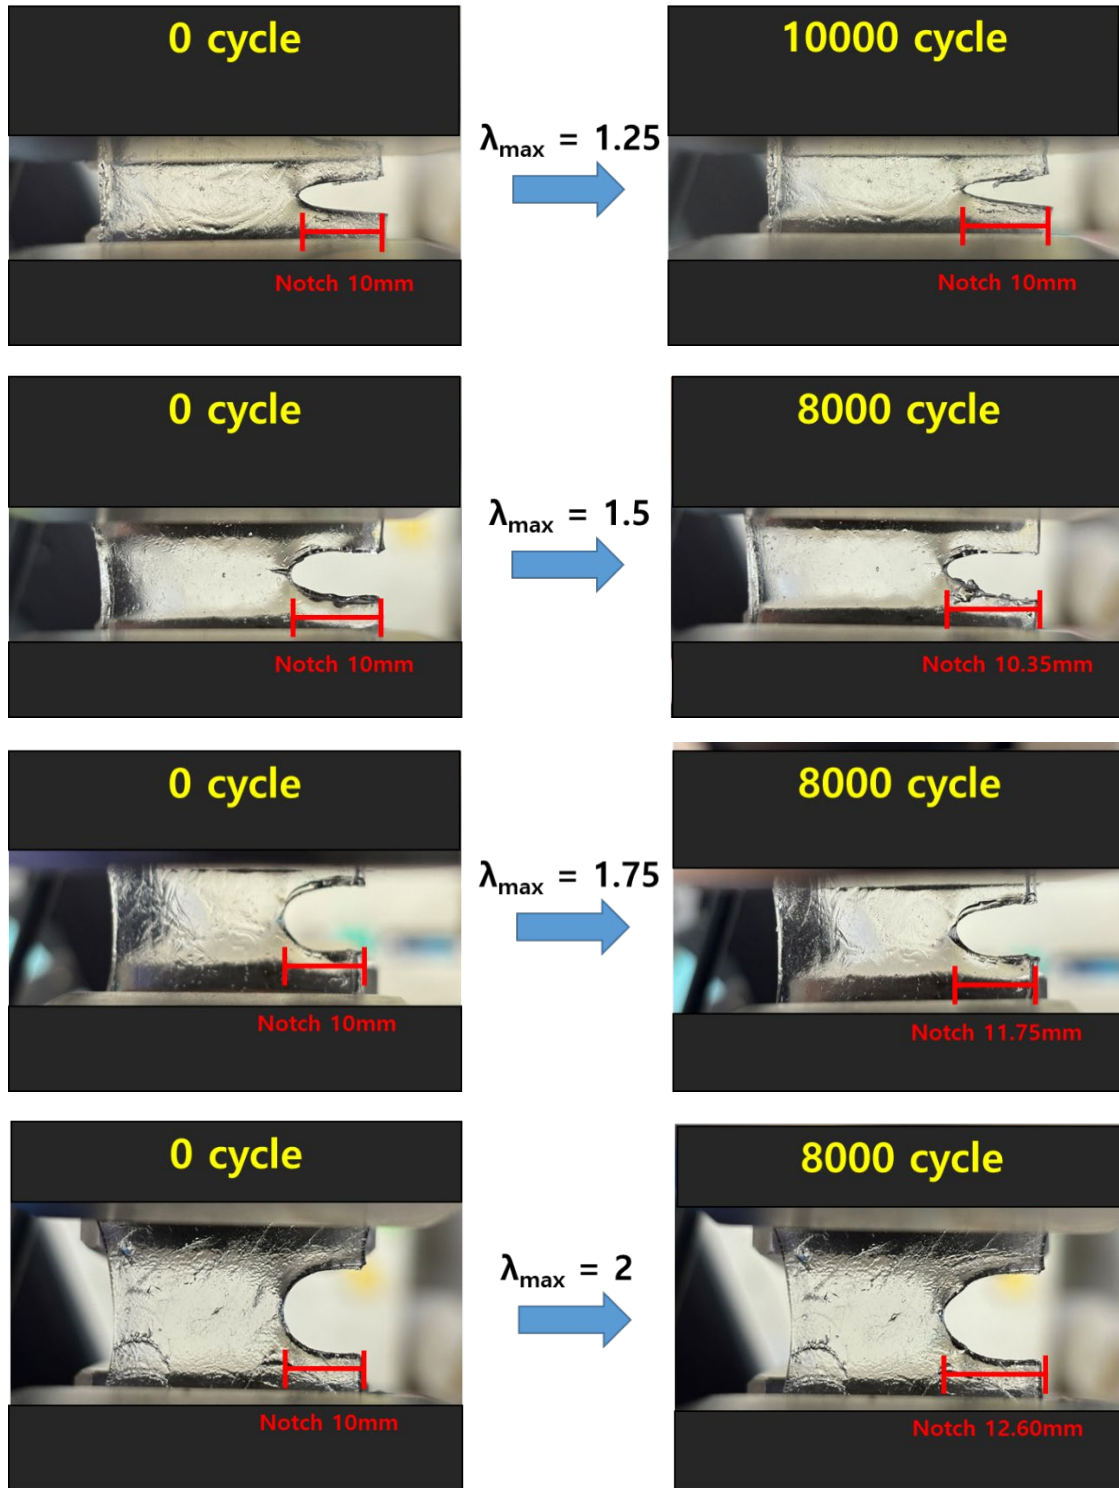

**Figure S20.** Progression of pre-crack length in single-notch DIC sensors during fatigue cycling tests at various  $\lambda_{\max}$  levels.



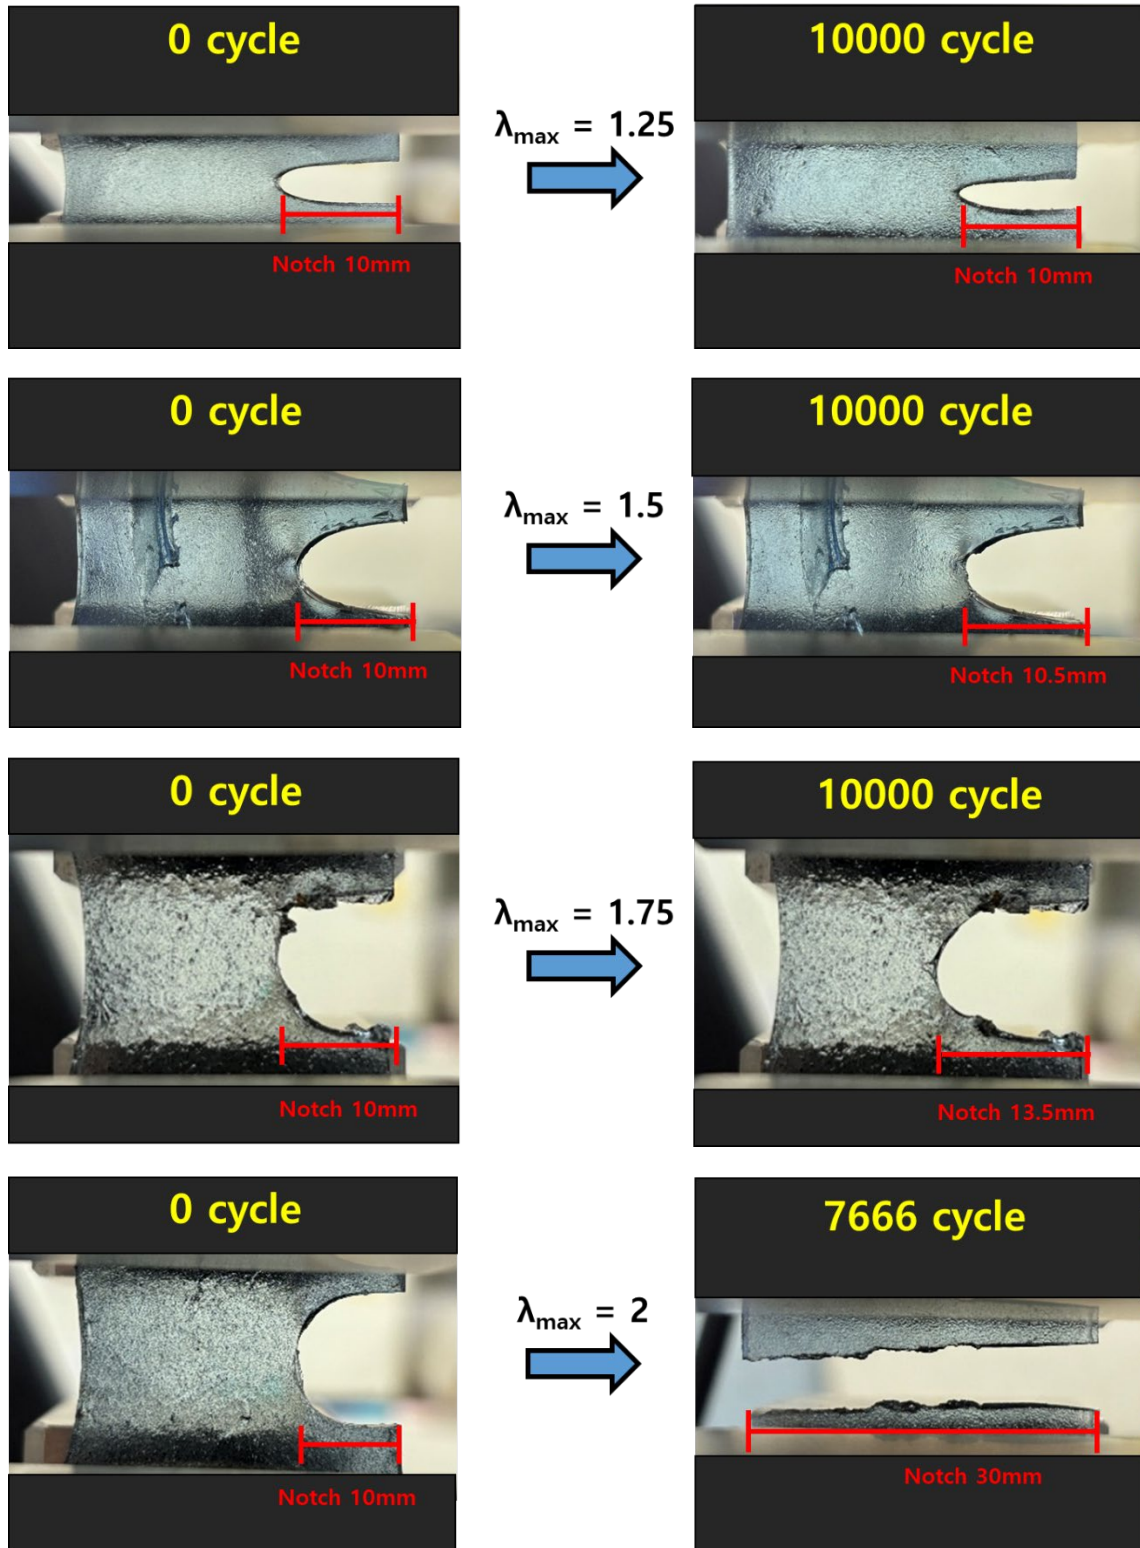

Figure S21. Progression of pre-crack length in single-notch MC 3 sensors during fatigue cycling tests at various  $\lambda_{\max}$  levels.

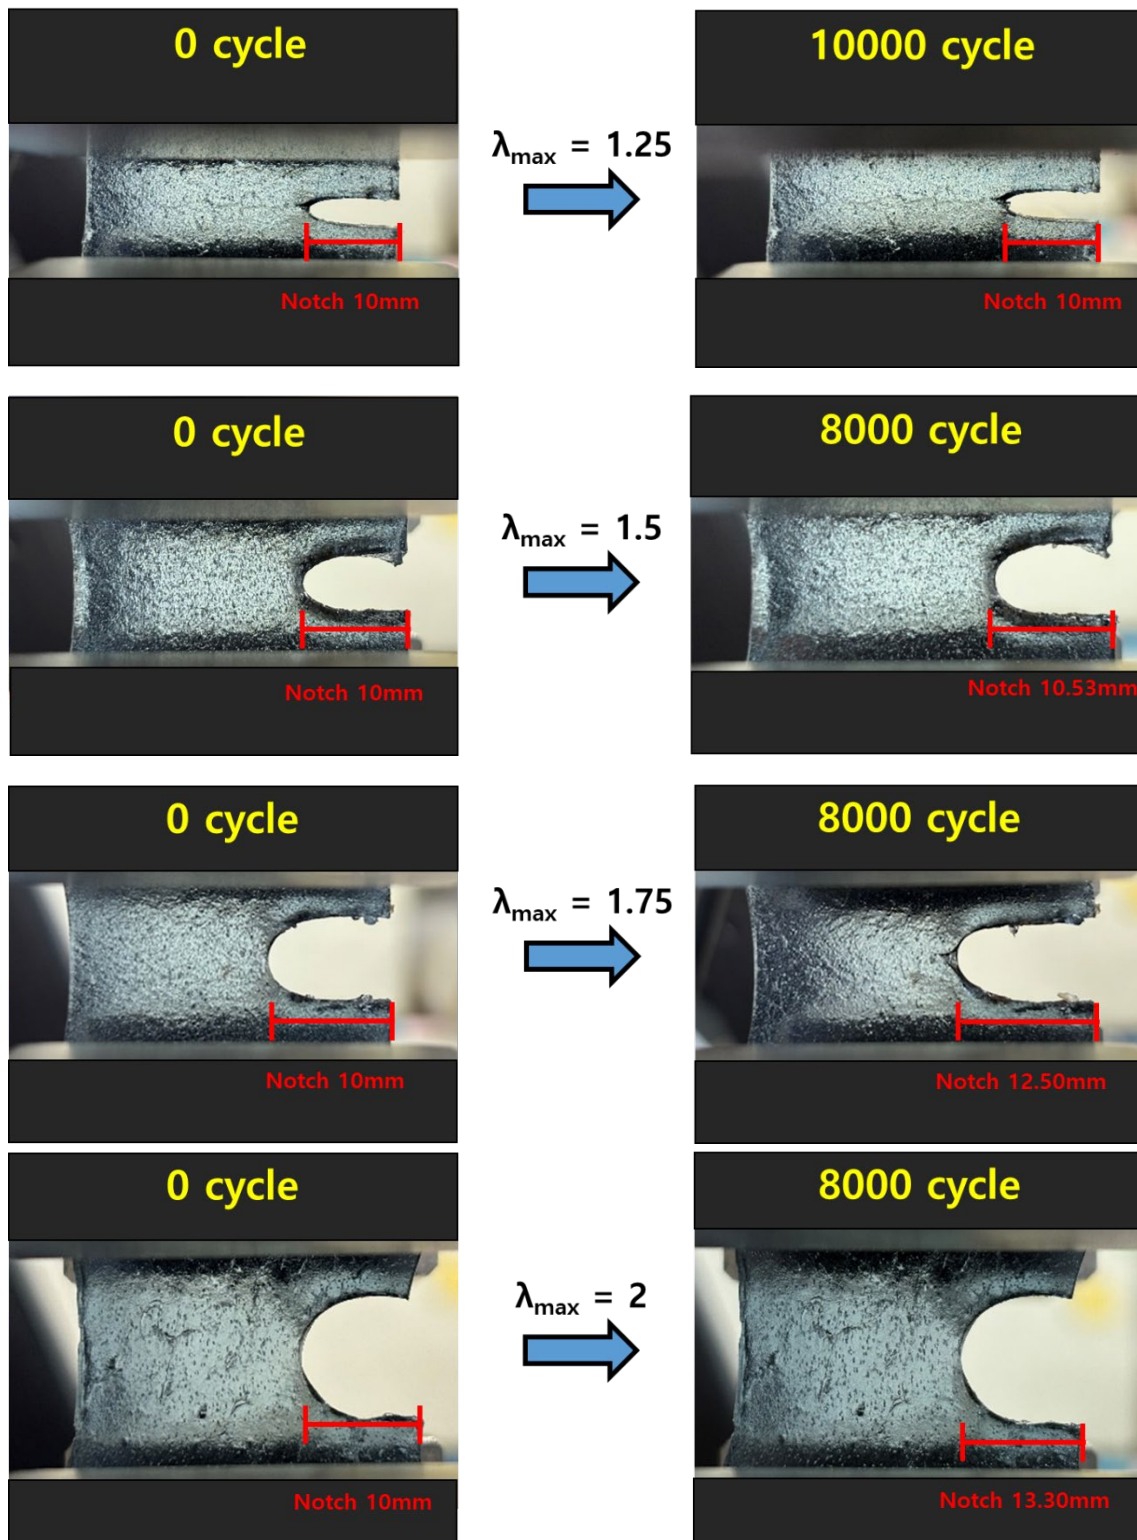

**Figure S22.** Progression of pre-crack length in single-notch DMC 3 sensors during fatigue cycling tests at various  $\lambda_{\max}$  levels.

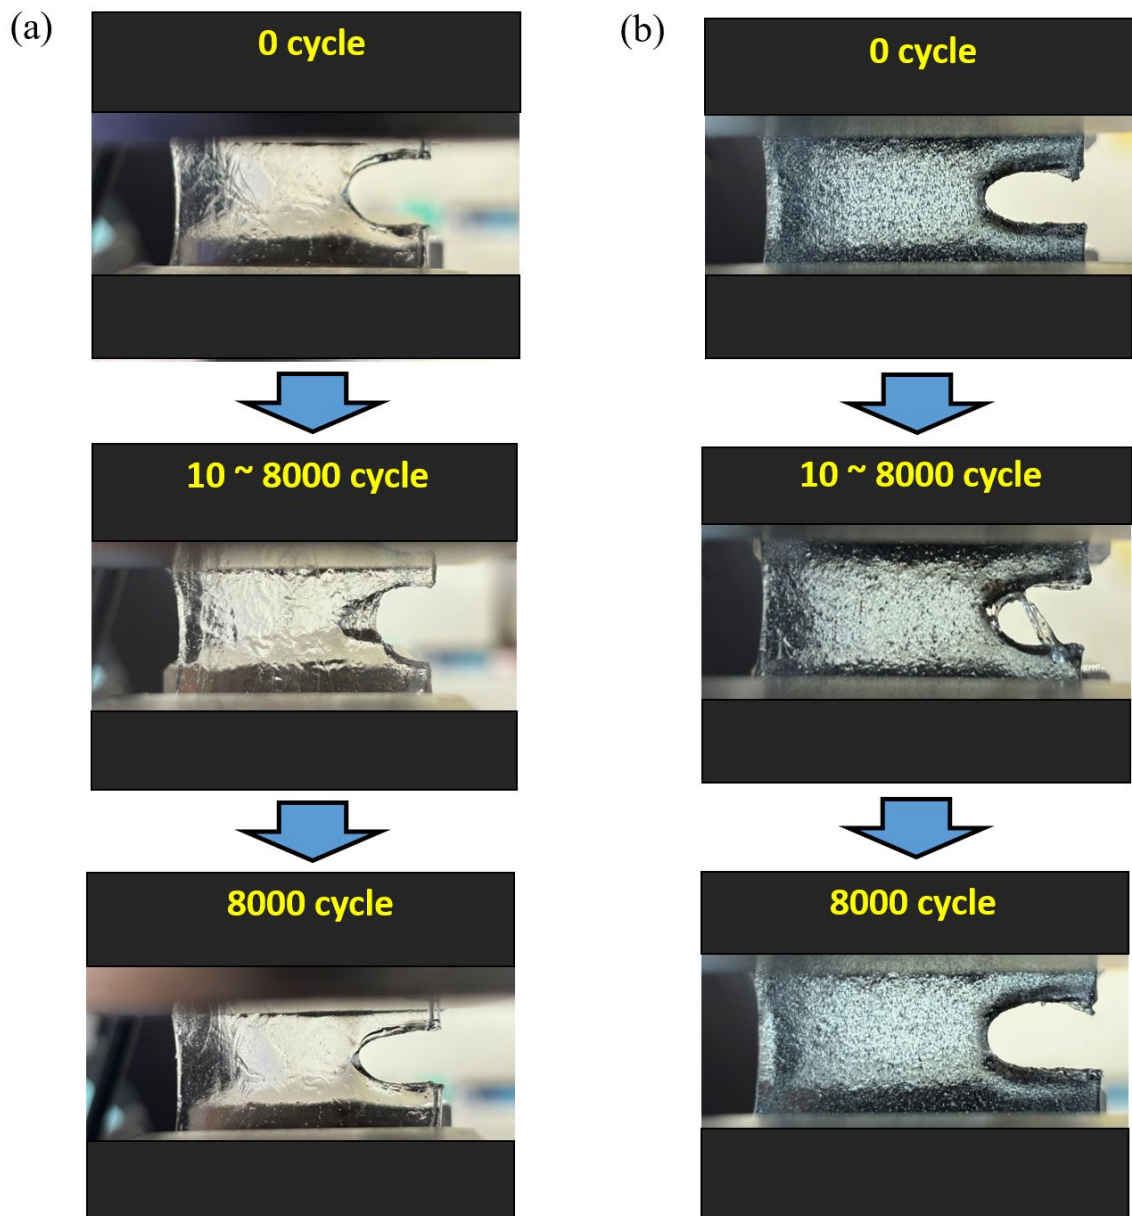

**Figure S23.** Photographs showing self-healing of (a) single-notch DIC at  $\lambda_{\max}=1.75$  and (b) single-notch DMC 3 at  $\lambda_{\max}=1.5$  during cyclic stretching from 10 to 8,000 cycles.

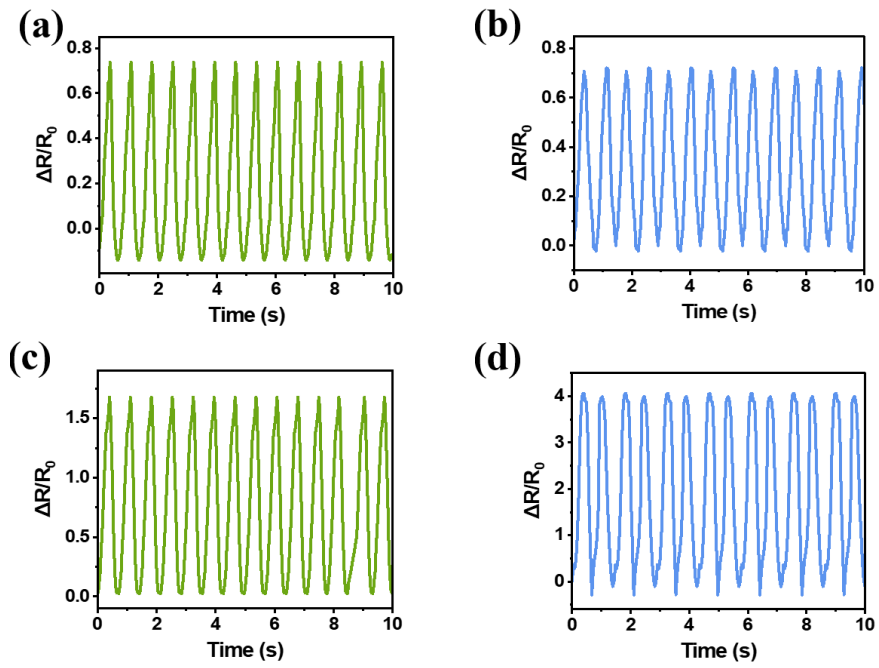

**Figure S24.** Response signals from the skin-attached DMC 3 sensors with different swelling ratios monitoring various human physiological movements. Ankle movements: (a) 10% and (c) 50%; Wrist movements: (b) 10% and (d) 50%.

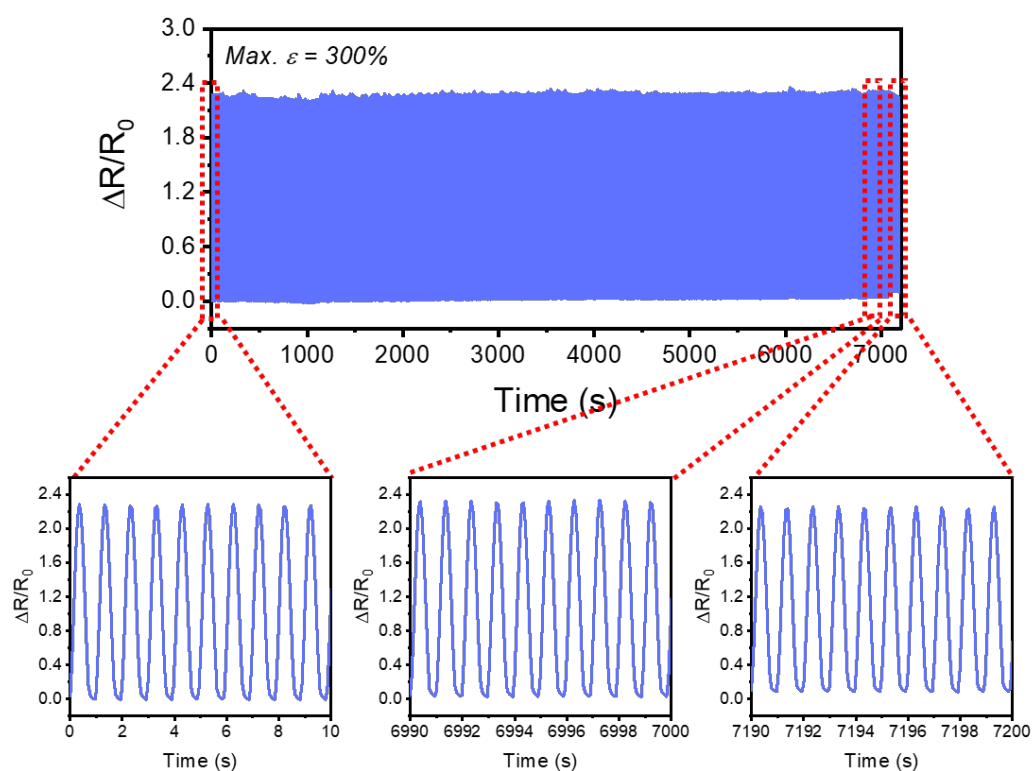

**Figure S25.** Relative resistance changes of the uncut DMC 3 sensor over 7,000 stretch-release cycles under 300% strain ( $\lambda_{\max} = 4$ ) at 1 Hz (top). The bottom graph shows the stable resistance response of the DMC 3 sensor during cyclic testing.

## Supplementary References

- [1] J.H. Lim, M.J. Kim, H.G. Yoon, S.W. Kim, *Compos. B Eng.* **2022**, 247, 110299.
- [2] Shen Z, Zhang Z, Zhang N, Li J, Zhou P, Hu F, et al. High-Stretchability, Ultralow-Hysteresis Conducting Polymer Hydrogel Strain Sensors for Soft Machines. *Advanced Materials* 2022;34. <https://doi.org/10.1002/adma.202203650>.
- [3] Lam TN, Lee GS, Kim B, Dinh Xuan H, Kim D, Yoo S Il, et al. Microfluidic preparation of highly stretchable natural rubber microfiber containing CNT/PEDOT:PSS hybrid for fabric-sewable wearable strain sensor. *Compos Sci Technol* 2021;210. <https://doi.org/10.1016/j.compscitech.2021.108811>.
- [4] Lee YY, Kang HY, Gwon SH, Choi GM, Lim SM, Sun JY, et al. A Strain-Insensitive Stretchable Electronic Conductor: PEDOT:PSS/Acrylamide Organogels. *Advanced Materials* 2016;28:1636–43. <https://doi.org/10.1002/adma.201504606>.
- [5] Ryu J, Kim J, Oh J, Lim S, Sim JY, Jeon JS, et al. Intrinsically stretchable multi-functional fiber with energy harvesting and strain sensing capability. *Nano Energy* 2019;55:348–53. <https://doi.org/10.1016/j.nanoen.2018.10.071>.
- [6] Bhattacharjee M, Soni M, Escobedo P, Dahiya R. PEDOT:PSS Microchannel-Based Highly Sensitive Stretchable Strain Sensor. *Adv Electron Mater* 2020;6. <https://doi.org/10.1002/aelm.202000445>.
- [7] Ko S, Chhetry A, Kim D, Yoon H, Park JY. Hysteresis-Free Double-Network Hydrogel-Based Strain Sensor for Wearable Smart Bioelectronics. *ACS Appl Mater Interfaces* 2022;14:31363–72. <https://doi.org/10.1021/acsami.2c09895>.
- [8] Liu S, Li L. Ultrastretchable and Self-Healing Double-Network Hydrogel for 3D Printing and Strain Sensor. *ACS Appl Mater Interfaces* 2017;9:26429–37. <https://doi.org/10.1021/acsami.7b07445>.
- [9] S. Azadi, S. Peng, S. A. Moshizi, M. Asadnia, J. Xu, I. Park, C. H. Wang, S. Wu, Biocompatible and Highly Stretchable PVA/AgNWs Hydrogel Strain Sensors for Human Motion Detection. *Adv Mater Technol* 2020;5. <https://doi.org/10.1002/admt.202000426>.
- [10] Giffney T, Bejanin E, Kurian AS, Travas-Sejdic J, Aw K. Highly stretchable printed strain sensors using multi-walled carbon nanotube/silicone rubber composites. *Sens Actuators A Phys* 2017;259:44–9. <https://doi.org/10.1016/j.sna.2017.03.005>.
- [11] Chu X, Wang R, Zhao H, Kuang M, Yan J, Wang B, et al. Cross-Links-Entanglements Integrated Networks Contributing to Highly Resilient, Soft, and Self-Adhesive Elastomers with Low Hysteresis for Green Wearable Electronics. *ACS Appl Mater Interfaces* 2022;14:16631–40. <https://doi.org/10.1021/acsami.2c00828>.
- [12] Choi DY, Kim MH, Oh YS, Jung SH, Jung JH, Sung HJ, et al. Highly stretchable, hysteresis-free ionic liquid-based strain sensor for precise human motion monitoring. *ACS Appl Mater Interfaces* 2017;9:1770–80. <https://doi.org/10.1021/acsami.6b12415>.
- [13] Zhang W, Zhang X, Zhao W, Wang X. High-Sensitivity Composite Dual-Network Hydrogel Strain Sensor and Its Application in Intelligent Recognition and Motion Monitoring. *ACS Appl Polym Mater* 2023;5:2628–38. <https://doi.org/10.1021/acsapm.2c02215>.
- [14] Xu L, Liu S, Zhu L, Liu Y, Li N, Shi X, et al. Hydroxypropyl methyl cellulose reinforced conducting polymer hydrogels with ultra-stretchability and low hysteresis as highly sensitive strain sensors for wearable health monitoring. *Int J Biol Macromol* 2023;236. <https://doi.org/10.1016/j.ijbiomac.2023.123956>.
- [15] Bian Z, Li Y, Sun H, Shi M, Zheng Y, Liu H, et al. Transparent, intrinsically stretchable cellulose nanofiber-

- mediated conductive hydrogel for strain and humidity sensing. *Carbohydr Polym* 2023;301. <https://doi.org/10.1016/j.carbpol.2022.120300>.
- [16] Feng E, Zheng G, Li X, Zhang M, Li X, Han X, et al. A toughened, transparent, anti-freezing and solvent-resistant hydrogel towards environmentally tolerant strain sensor and soft connection. *Colloids Surf A Physicochem Eng Asp* 2023;656. <https://doi.org/10.1016/j.colsurfa.2022.130390>.
- [17] Asad Ullah Khalid M, Hwan Chang S. Characterization of highly linear stretchable sensor made of Gr-PEDOT:PSS/MnO<sub>2</sub> nanowires/Ecoflex composite. *Compos Struct* 2023;311. <https://doi.org/10.1016/j.compstruct.2023.116824>.
- [18] Liu K, Yang C, Song L, Wang Y, Wei Q, Alamusi, et al. Highly stretchable, superhydrophobic and wearable strain sensors based on the laser-irradiated PDMS/CNT composite. *Compos Sci Technol* 2022;218. <https://doi.org/10.1016/j.compscitech.2021.109148>.
- [19] Zhan P, Jia Y, Zhai W, Zheng G, Dai K, Liu C, et al. A fibrous flexible strain sensor with Ag nanoparticles and carbon nanotubes for synergetic high sensitivity and large response range. *Compos Part A Appl Sci Manuf* 2023;167. <https://doi.org/10.1016/j.compositesa.2023.107431>.
- [20] Yazdani S, Khan M, Shahzad A, Shah LA, Ye D. Ionic conductive hydrogels formed through hydrophobic association for flexible strain sensing. *Sens Actuators A Phys* 2023;350. <https://doi.org/10.1016/j.sna.2022.114148>.
- [21] Wen N, Guan X, Fan Z, Guo Y, Cong T, Huang H, et al. A highly stretchable and breathable self-powered dual-parameter sensor for decoupled temperature and strain sensing. *Org Electron* 2023;113. <https://doi.org/10.1016/j.orgel.2022.106723>.
- [22] Park H, Kim DS, Hong SY, Kim C, Yun JY, Oh SY, et al. A skin-integrated transparent and stretchable strain sensor with interactive color-changing electrochromic displays. *Nanoscale* 2017;9:7631–40. <https://doi.org/10.1039/c7nr02147j>.
- [23] Wang Y, Jia Y, Zhou Y, Wang Y, Zheng G, Dai K, et al. Ultra-stretchable, sensitive and durable strain sensors based on polydopamine encapsulated carbon nanotubes/elastic bands. *J Mater Chem C Mater* 2018;6:8160–70. <https://doi.org/10.1039/c8tc02702a>.
- [24] Yang Y, Shi L, Cao Z, Wang R, Sun J. Strain Sensors with a High Sensitivity and a Wide Sensing Range Based on a Ti<sub>3</sub>C<sub>2</sub>T<sub>x</sub> (MXene) Nanoparticle–Nanosheet Hybrid Network. *Adv Funct Mater* 2019;29. <https://doi.org/10.1002/adfm.201807882>.
- [25] Fan X, Wang N, Wang J, Xu B, Yan F. Highly sensitive, durable and stretchable plastic strain sensors using sandwich structures of PEDOT:PSS and an elastomer. *Mater Chem Front* 2018;2:355–61. <https://doi.org/10.1039/c7qm00497d>.
- [26] Yang Y, Cao Z, He P, Shi L, Ding G, Wang R, et al. Ti<sub>3</sub>C<sub>2</sub>T<sub>x</sub> MXene-graphene composite films for wearable strain sensors featured with high sensitivity and large range of linear response. *Nano Energy* 2019;66. <https://doi.org/10.1016/j.nanoen.2019.104134>.
- [27] Shi G, Liu T, Kopecki Z, Cowin A, Lee I, Pai J-H, et al. A Multifunctional Wearable Device with a Graphene/Silver Nanowire Nanocomposite for Highly Sensitive Strain Sensing and Drug Delivery. *C (Basel)* 2019;5:17. <https://doi.org/10.3390/c5020017>.
- [28] Wang Y, Hao J, Huang Z, Zheng G, Dai K, Liu C, et al. Flexible electrically resistive-type strain sensors based on reduced graphene oxide-decorated electrospun polymer fibrous mats for human motion monitoring. *Carbon N Y* 2018;126:360–71. <https://doi.org/10.1016/j.carbon.2017.10.034>.
- [29] Liu P, Pan W, Liu Y, Liu J, Xu W, Guo X, et al. Fully flexible strain sensor from core-spun elastic threads with integrated electrode and sensing cell based on conductive nanocomposite. *Compos Sci Technol*

2018;159:42–9. <https://doi.org/10.1016/j.compscitech.2018.02.034>.

- [30] Liu X, Tang C, Du X, Xiong S, Xi S, Liu Y, et al. A highly sensitive graphene woven fabric strain sensor for wearable wireless musical instruments. *Mater Horiz* 2017;4:477–86. <https://doi.org/10.1039/c7mh00104e>.
